# Supplementary material for: Proteomics and bioinformatics analysis reveal potential roles of cadmium-binding proteins in cadmium tolerance and accumulation of Enterobacter cloacae
Source: PeerJ journal article supplement (doi:10.7717/peerj.6904), 2019-09-02

**Supplementary Table 1** 2D-DIGE experimental design.

| <b>Gel</b> | <b>Cy2</b>      | <b>Cy3</b>   | <b>Cy5</b>   |
|------------|-----------------|--------------|--------------|
| <b>1</b>   | Pooled Standard | 07 Cd N1     | ATCC Ctrl N1 |
| <b>2</b>   | Pooled Standard | 01 Ctrl N2   | 01 Cd N2     |
| <b>3</b>   | Pooled Standard | 01 Ctrl N1   | 07 Ctrl N3   |
| <b>4</b>   | Pooled Standard | 07 Ctrl N2   | 07 Cd N2     |
| <b>5</b>   | Pooled Standard | ATCC Ctrl N3 | 07 Ctrl N1   |
| <b>6</b>   | Pooled Standard | 07 Cd N3     | 01 Ctrl N3   |
| <b>7</b>   | Pooled Standard | ATCC Ctrl N2 | ATCC Cd N2   |
| <b>8</b>   | Pooled Standard | ATCC Cd N1   | 01 Cd N1     |
| <b>9</b>   | Pooled Standard | 01 Cd N3     | ATCC Cd N3   |

Gel 1 Cy2 vs 07 Cd N1(Cy3) vs ATCC Ctrl N1(Cy5)

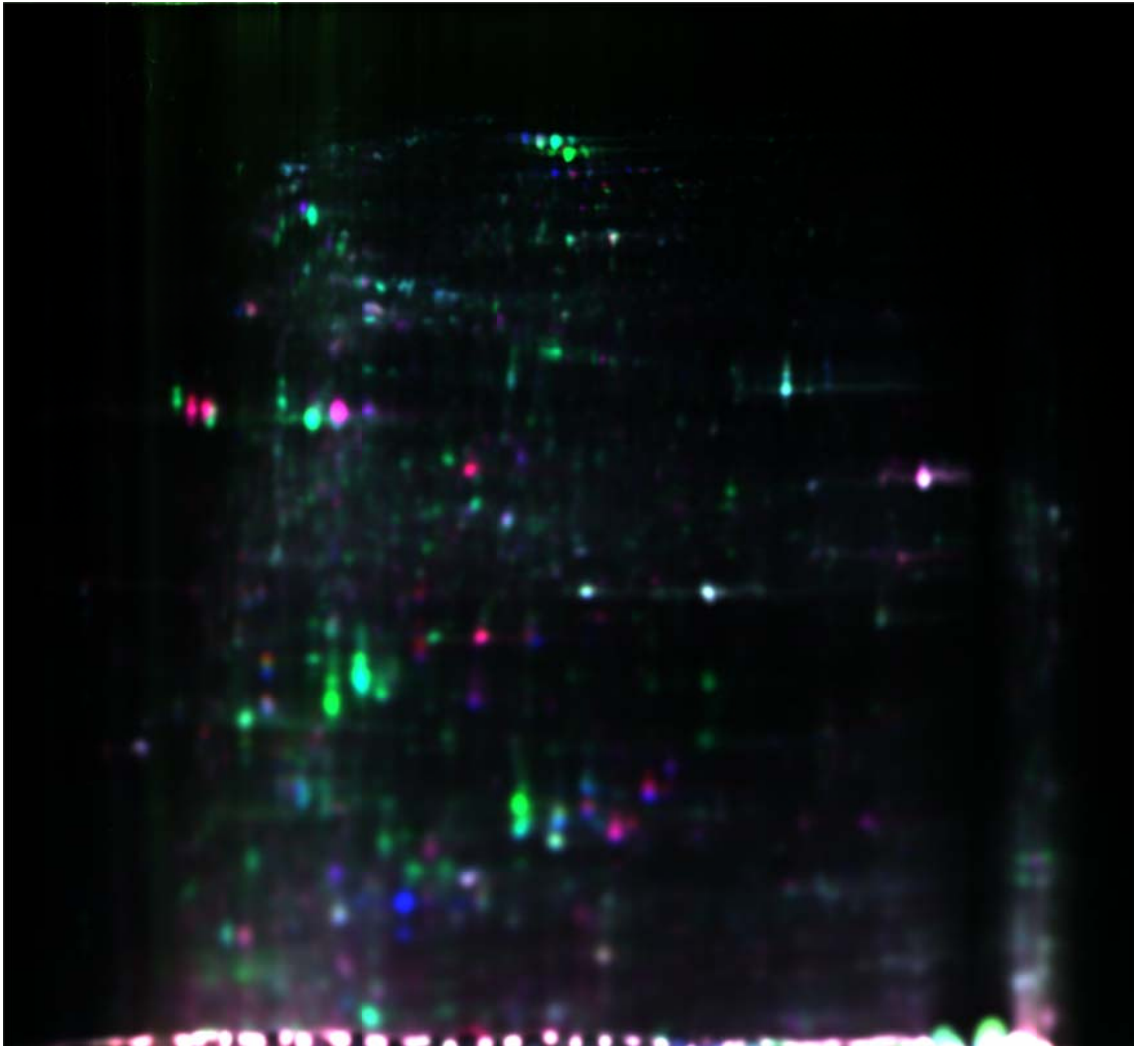

Gel 1 Cy2 vs 07 Cd N1(Cy3)

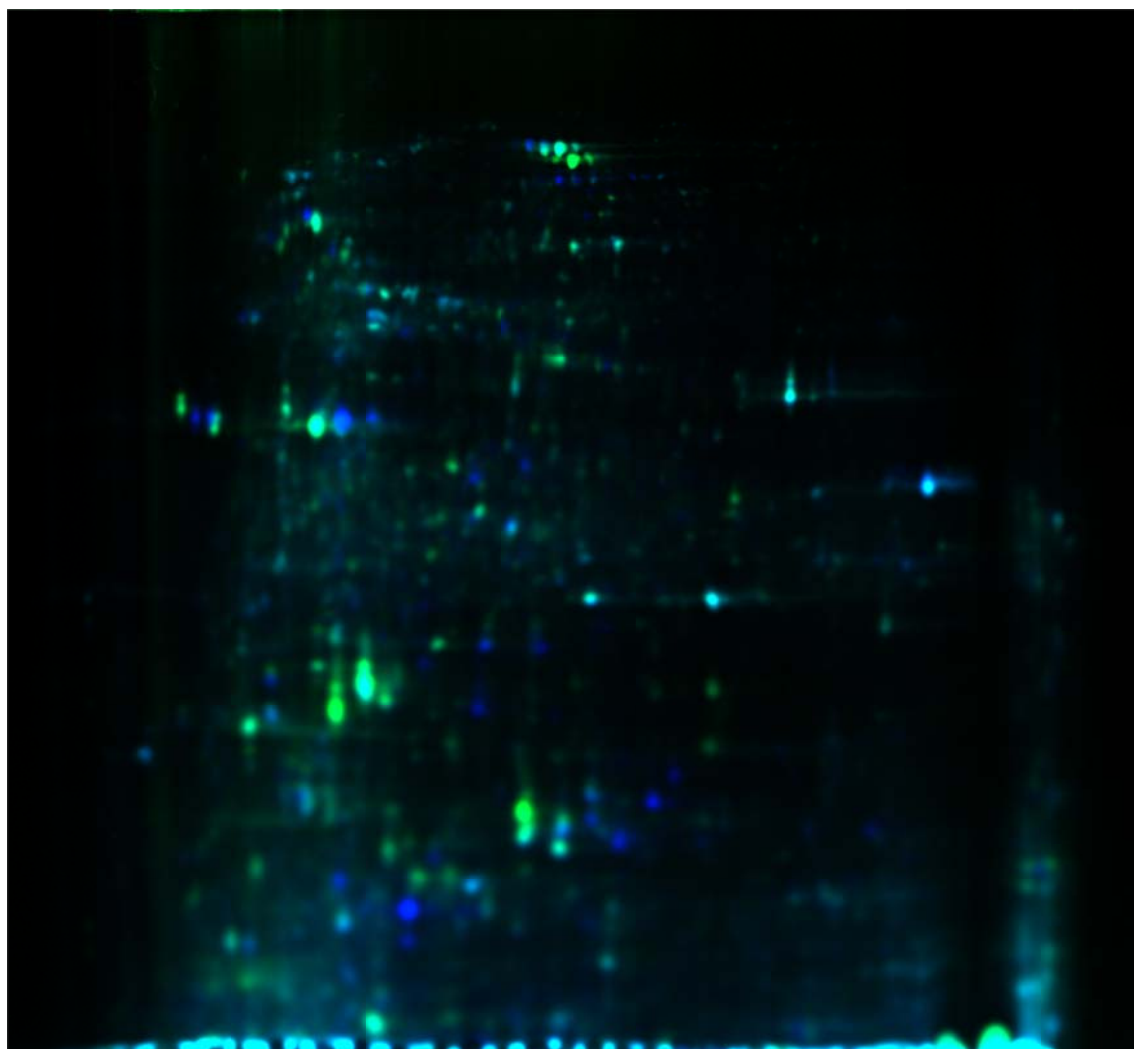

Gel 1 Cy2 vs ATCC Ctrl N1(Cy5)

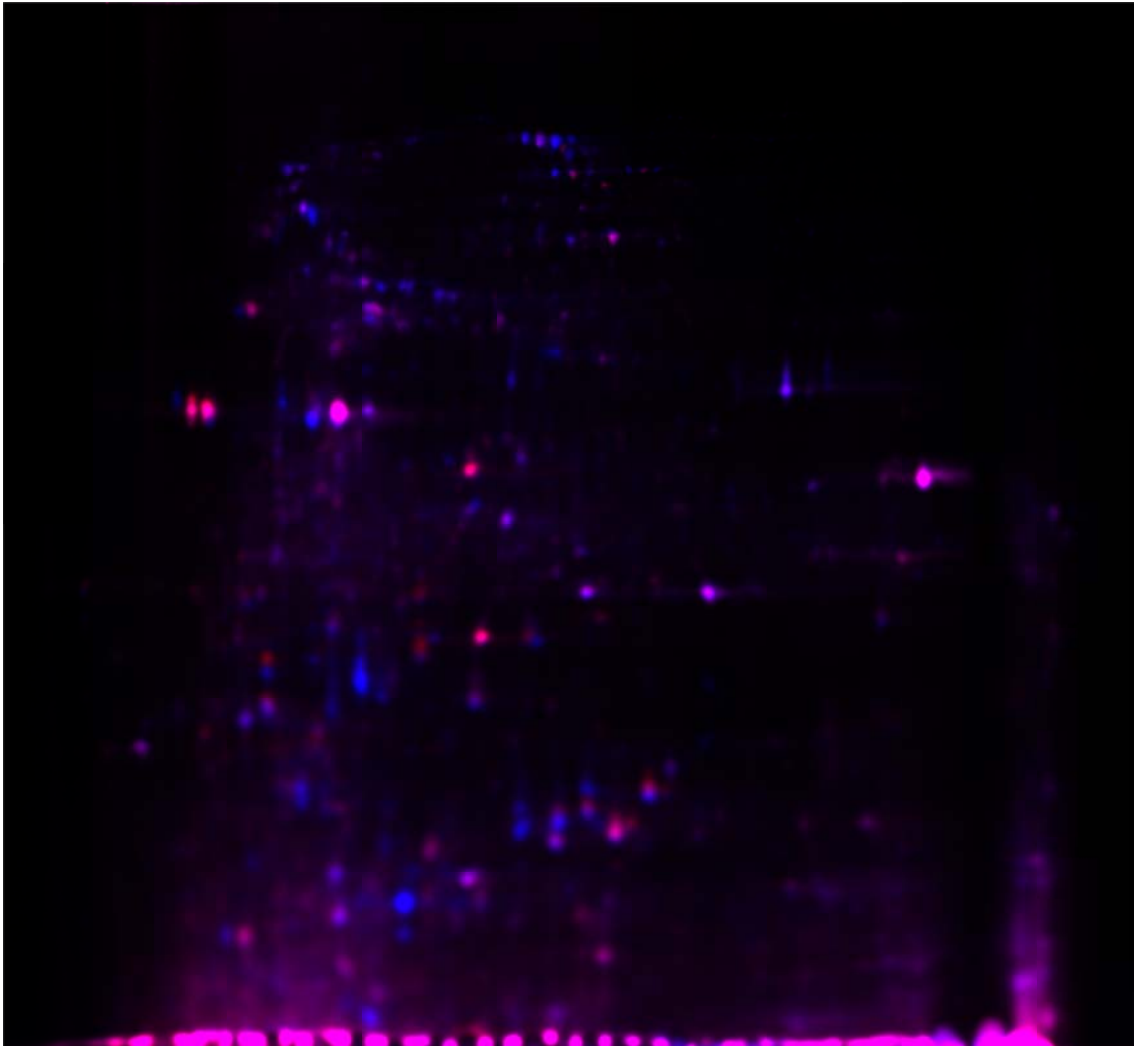

Gel 1 07 Cd N1(Cy3) vs ATCC Ctrl N1(Cy5)

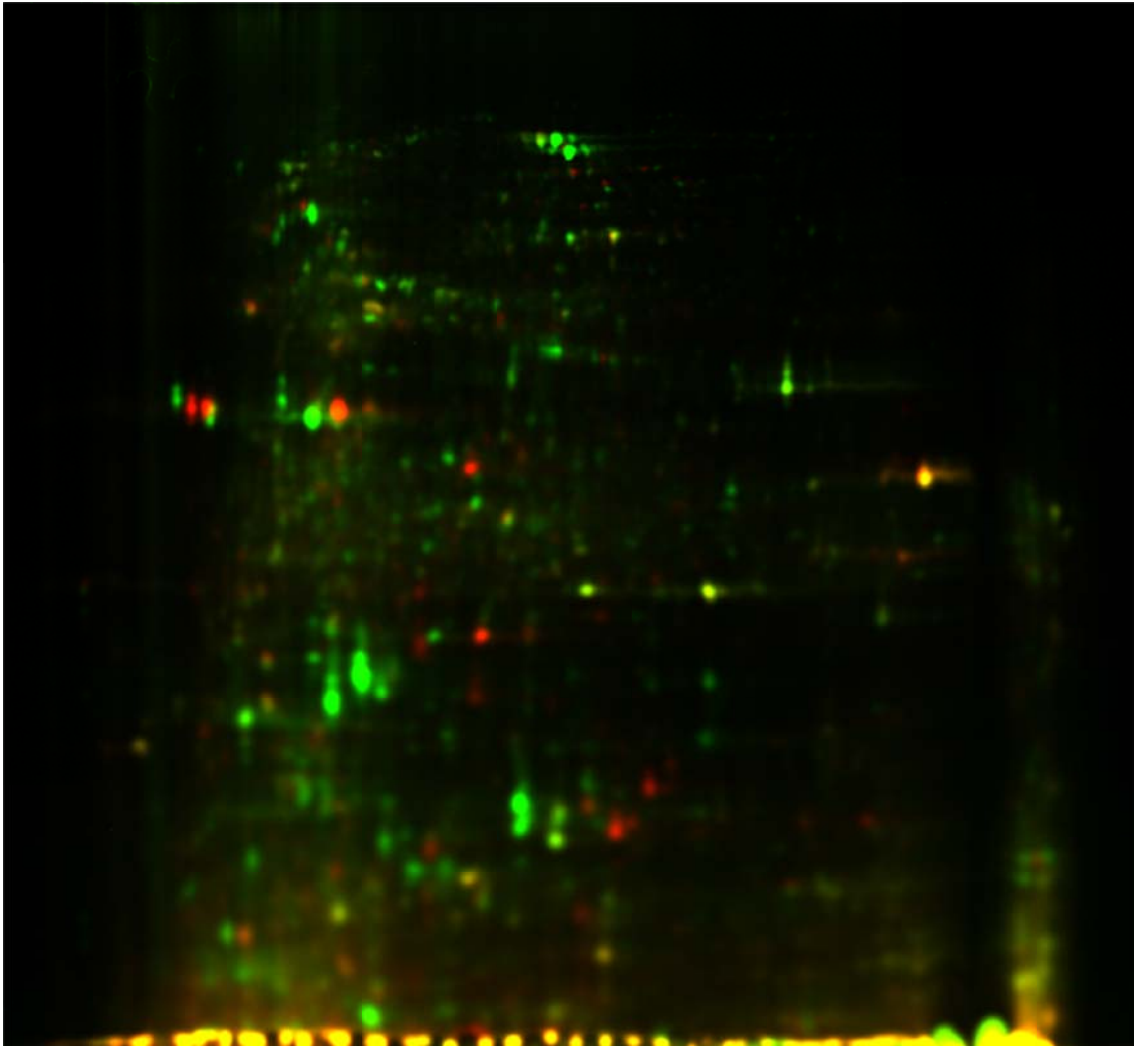

Gel 2 Cy2 vs 01 Ctrl N2(Cy3) vs 01 Cd N2(Cy5)

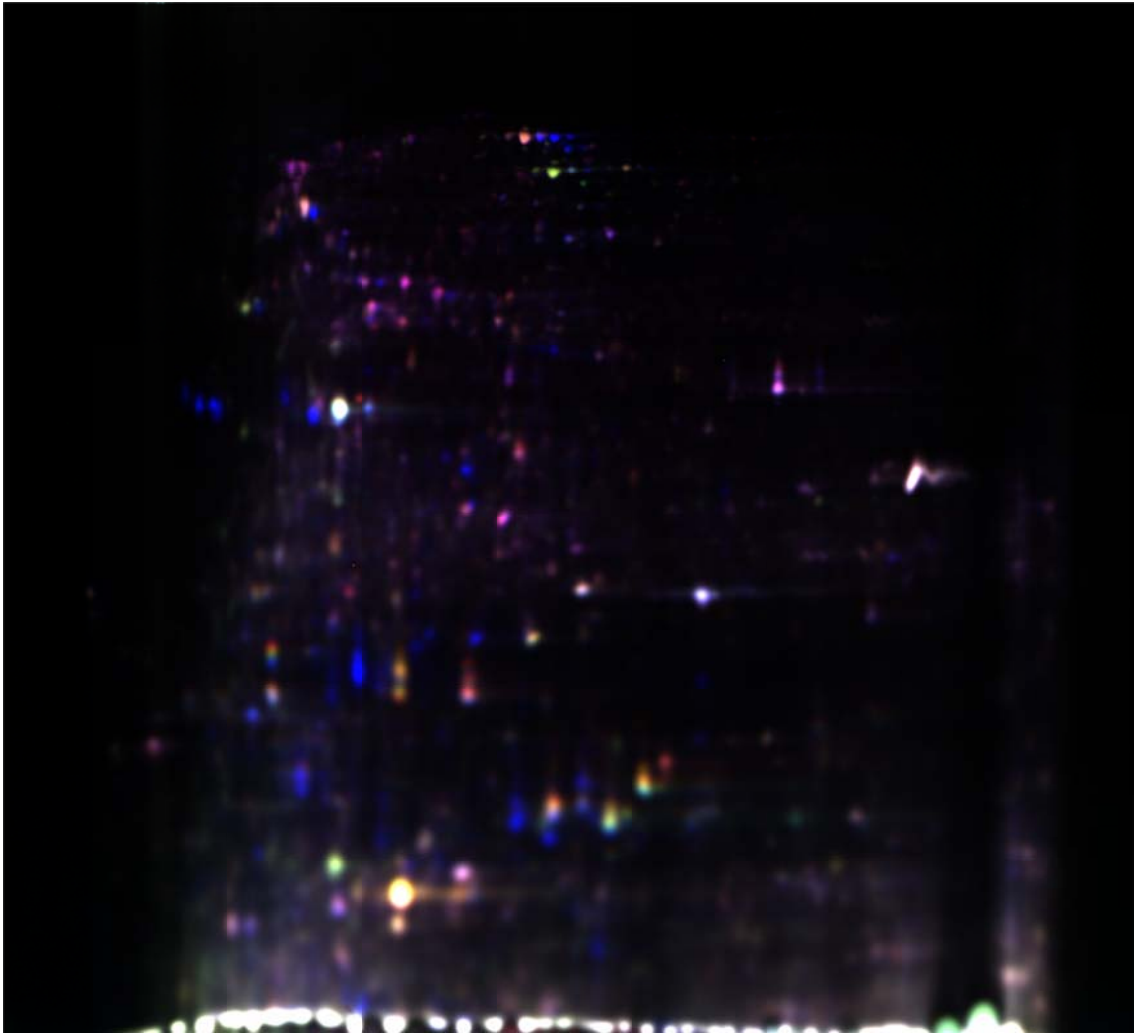

Gel 2 Cy2 vs 01 Ctrl N2(Cy3)

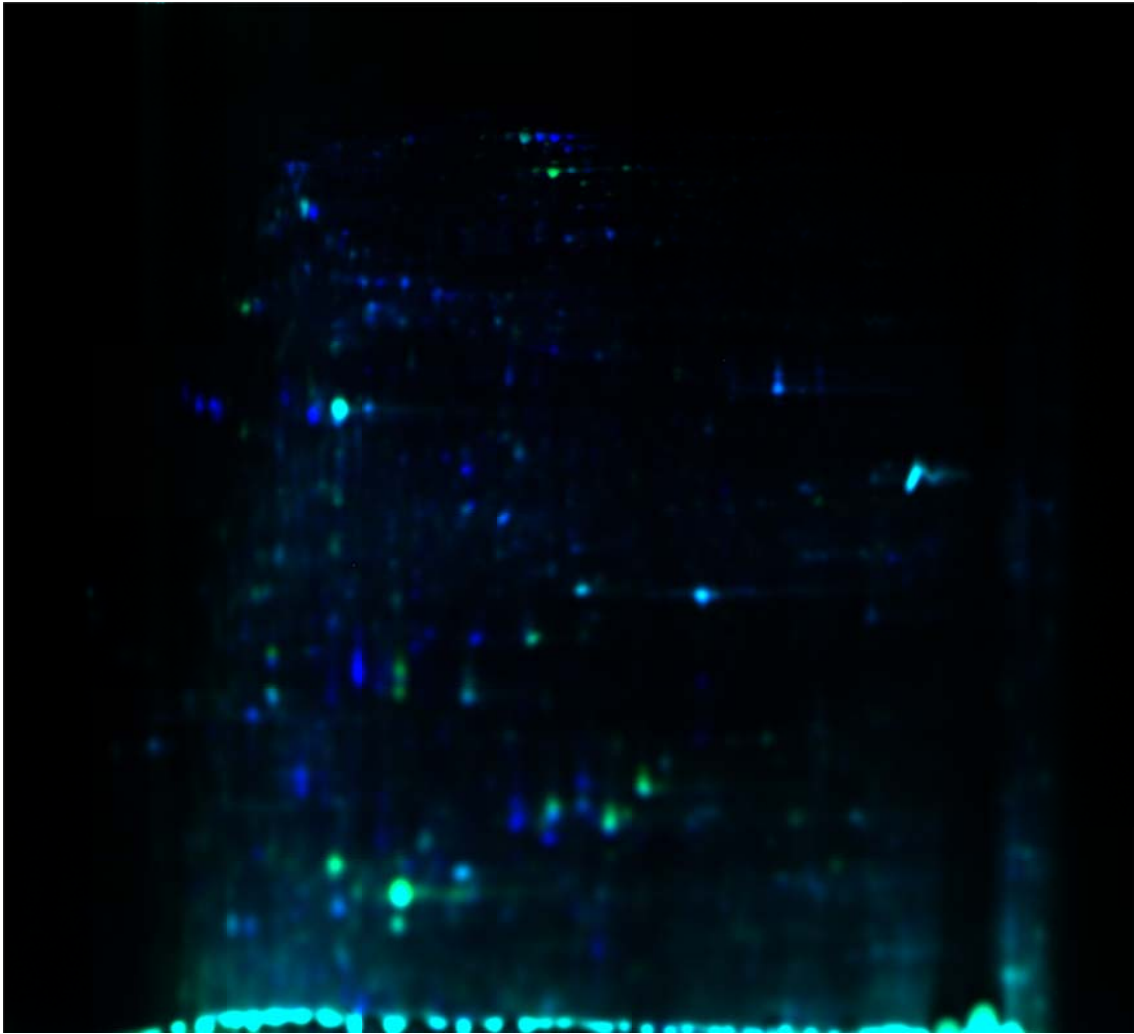

Gel 2 Cy2 vs 01 Cd N2(Cy5)

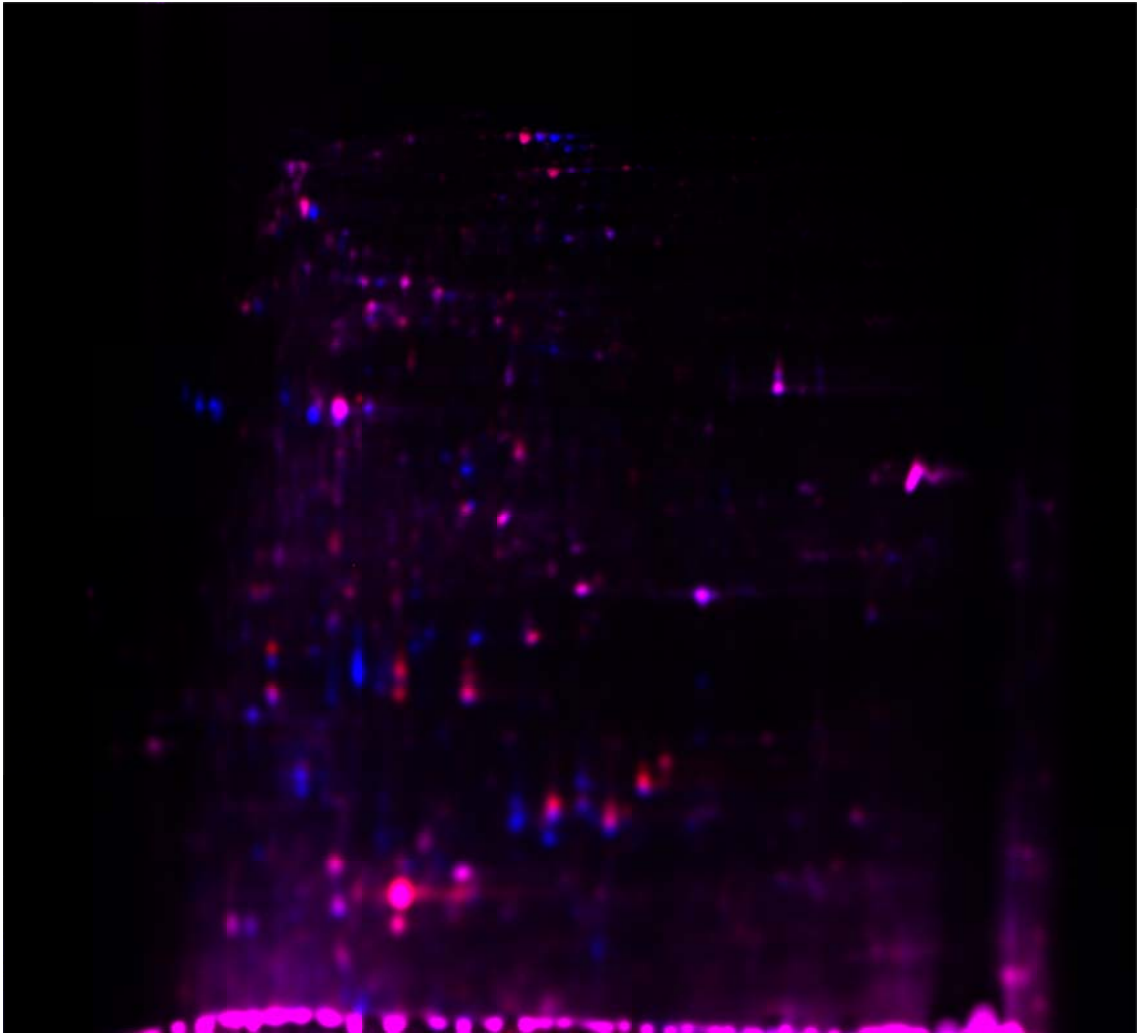



Gel 2 01 Ctrl N2(Cy3) vs 01 Cd N2(Cy5)

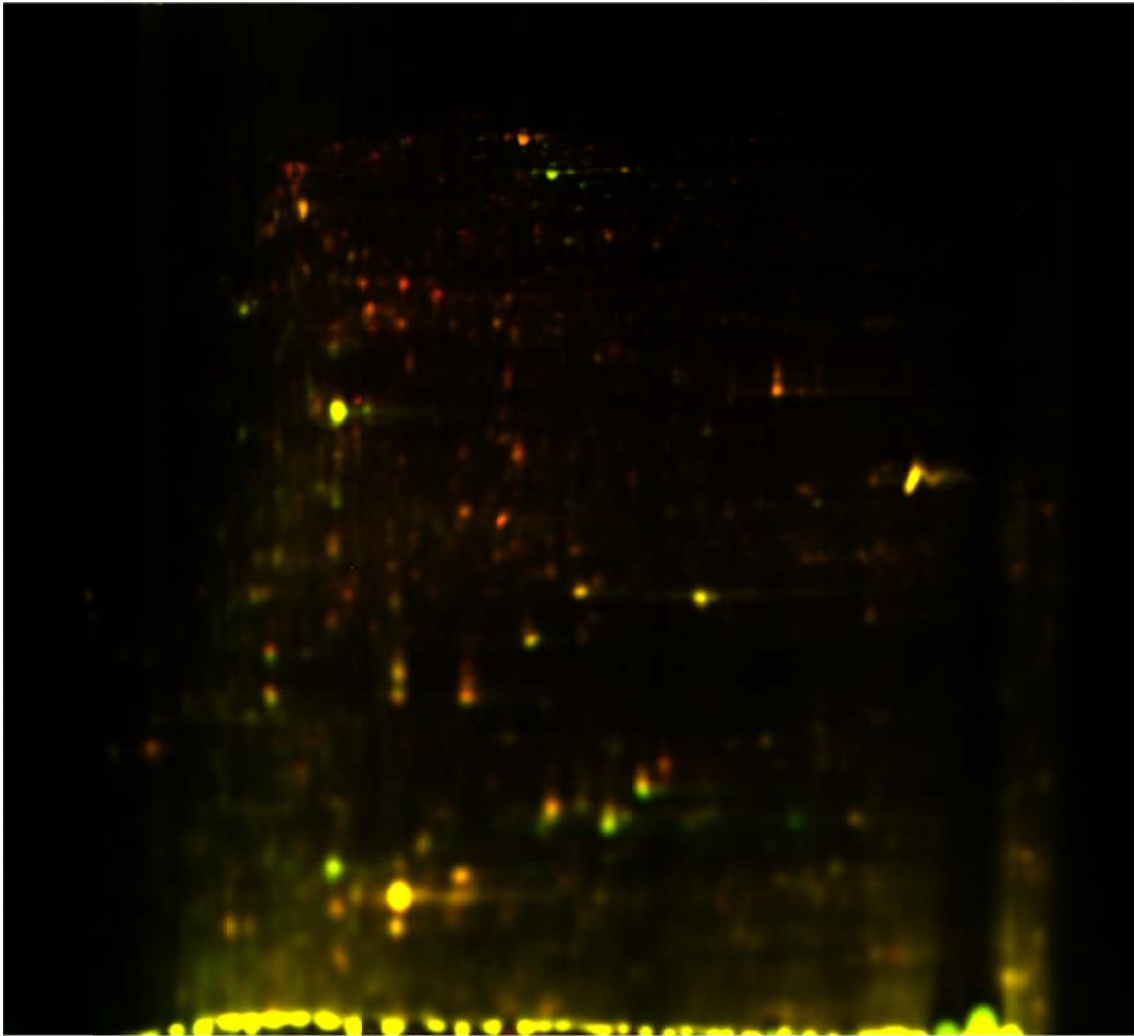

Gel 3 Cy2 vs 01 Ctrl N1(Cy3) vs 07 Ctrl N3(Cy5)

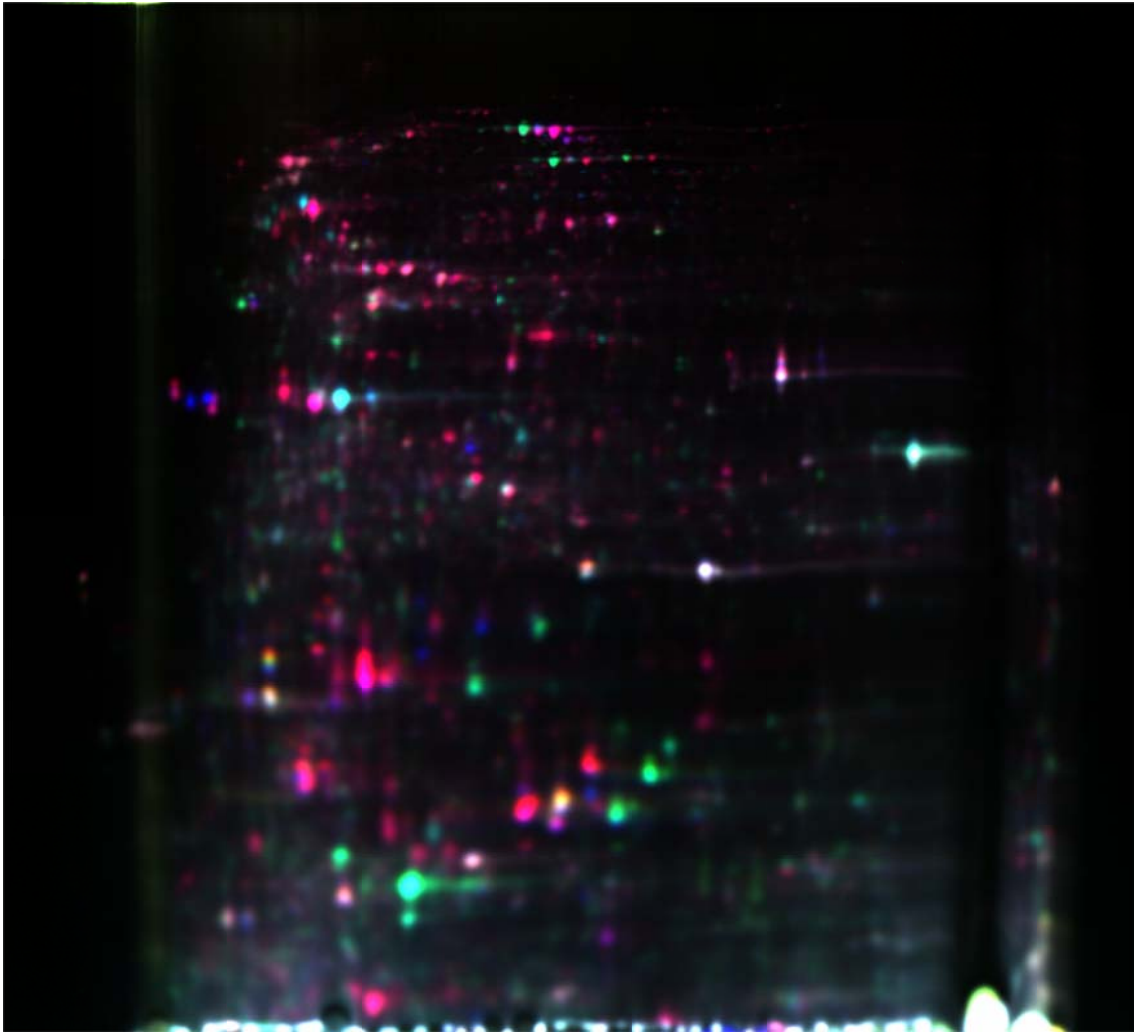

Gel 3 Cy2 vs 01 Ctrl N1(Cy3)

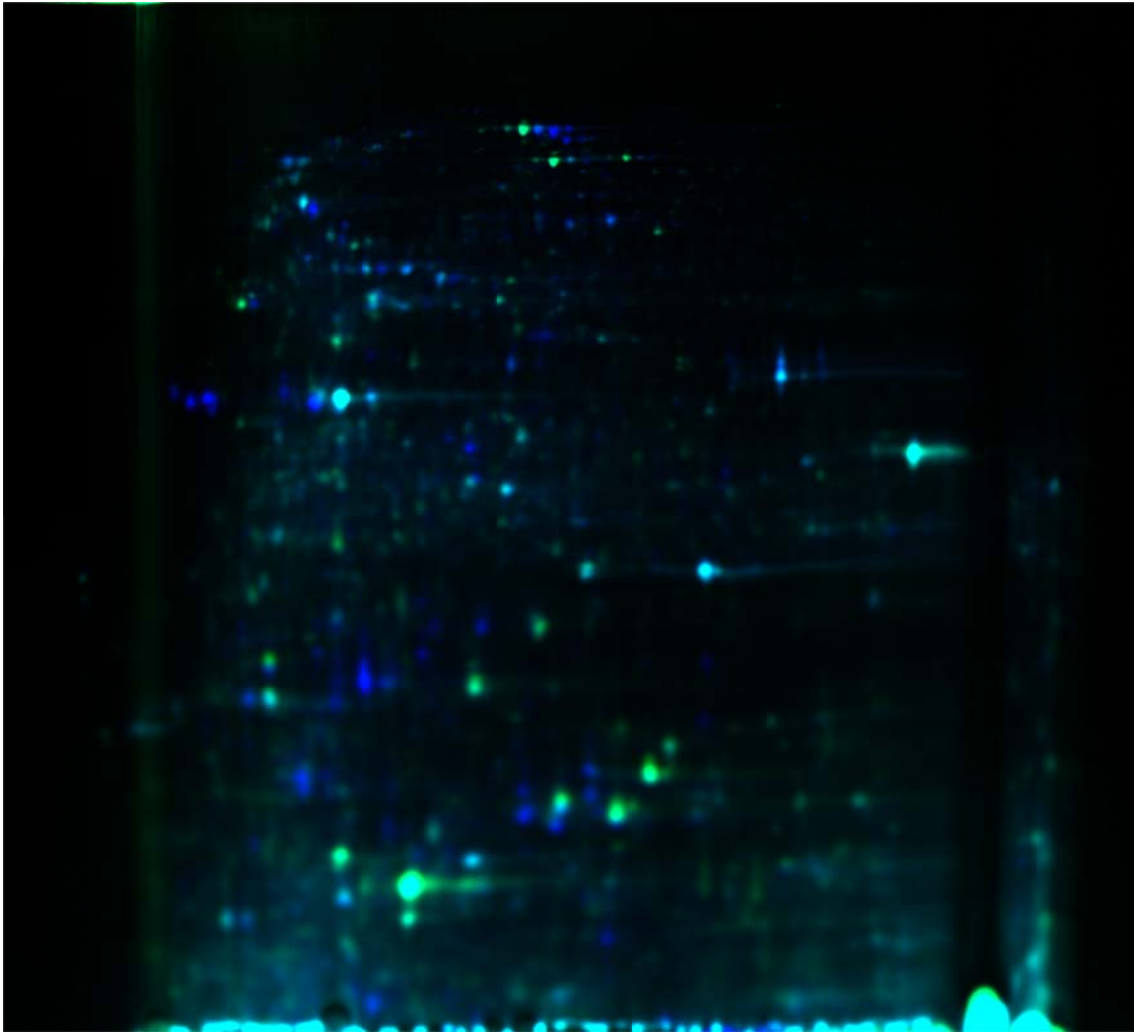

Gel 3 Cy2 vs 07 Ctrl N3(Cy5)

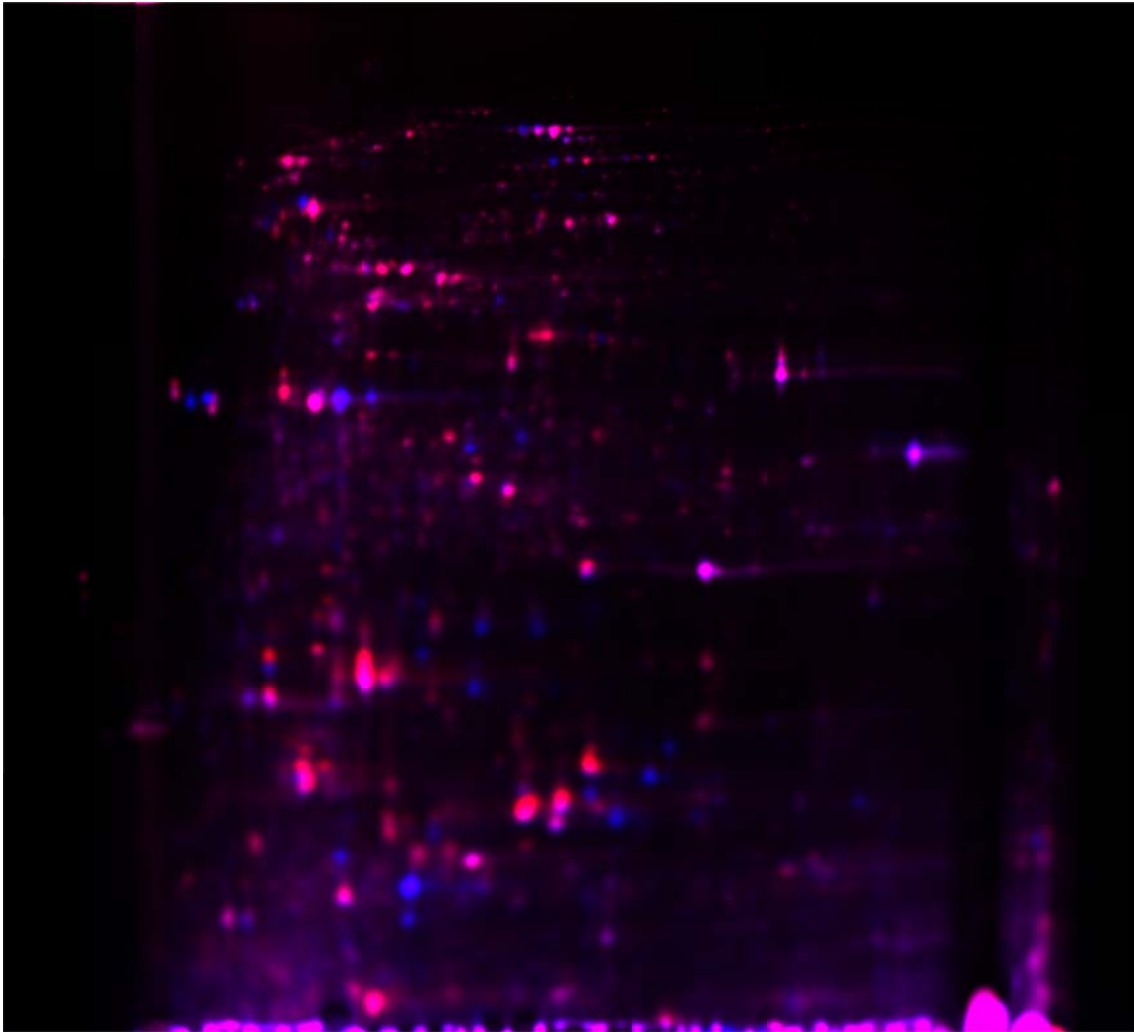

Gel 3 01 Ctrl N1(Cy3) vs 07 Ctrl N3(Cy5)

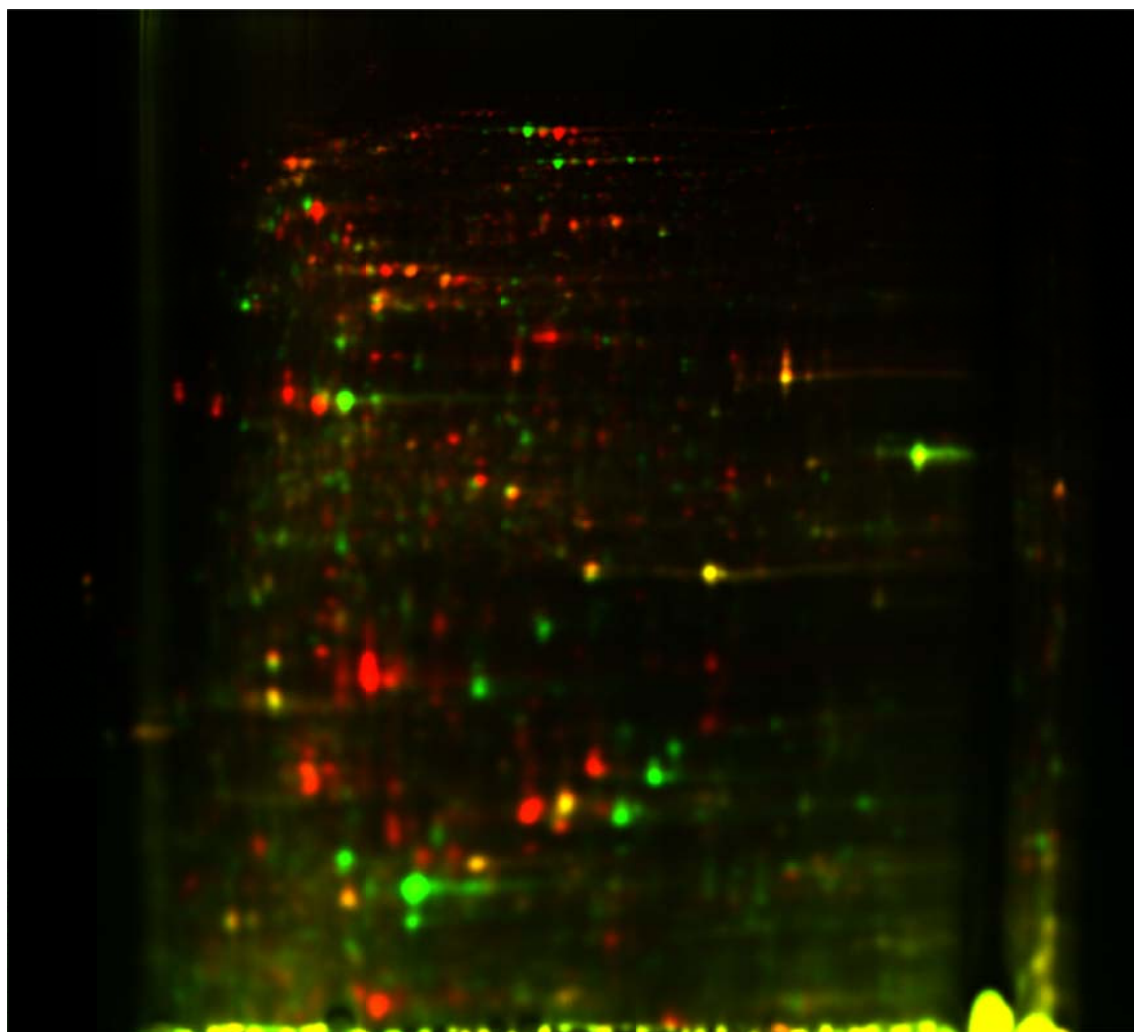

Gel 4 Cy2 vs 07 Ctrl N2(Cy3) vs 07 Cd N2(Cy5)

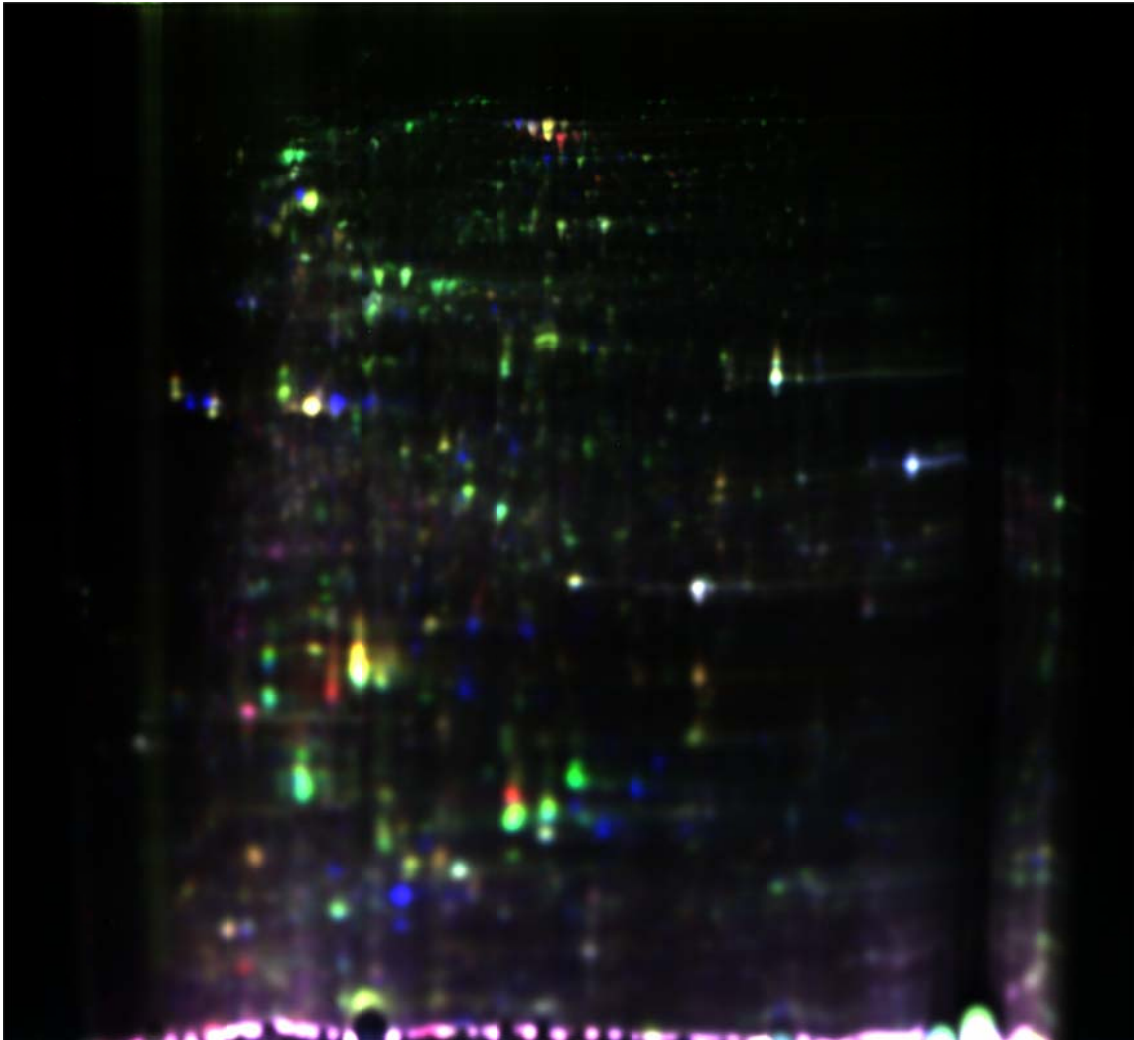

Gel 4 Cy2 vs 07 Ctrl N2(Cy3)

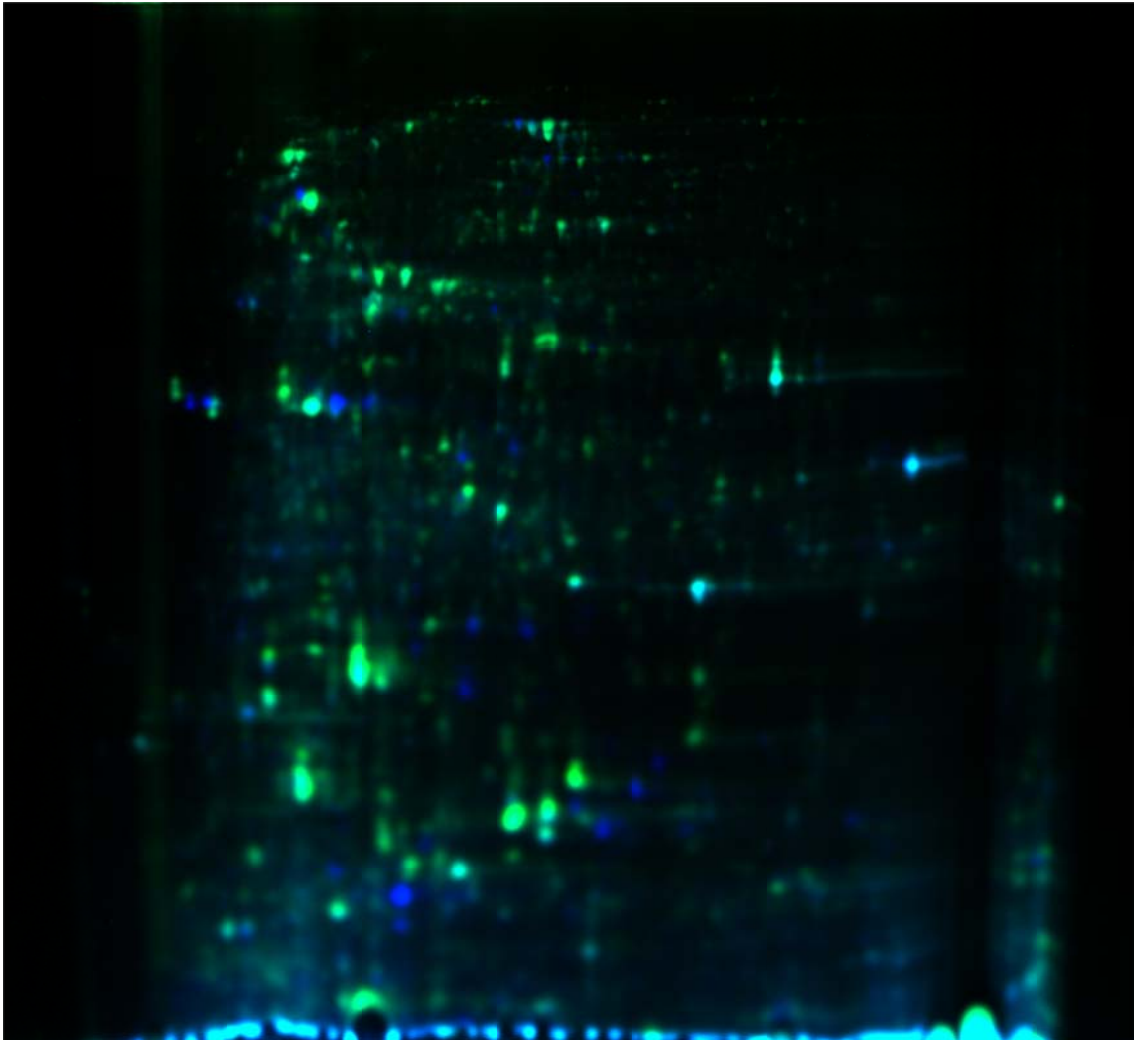

Gel 4 Cy2 vs 07 Cd N2(Cy5)

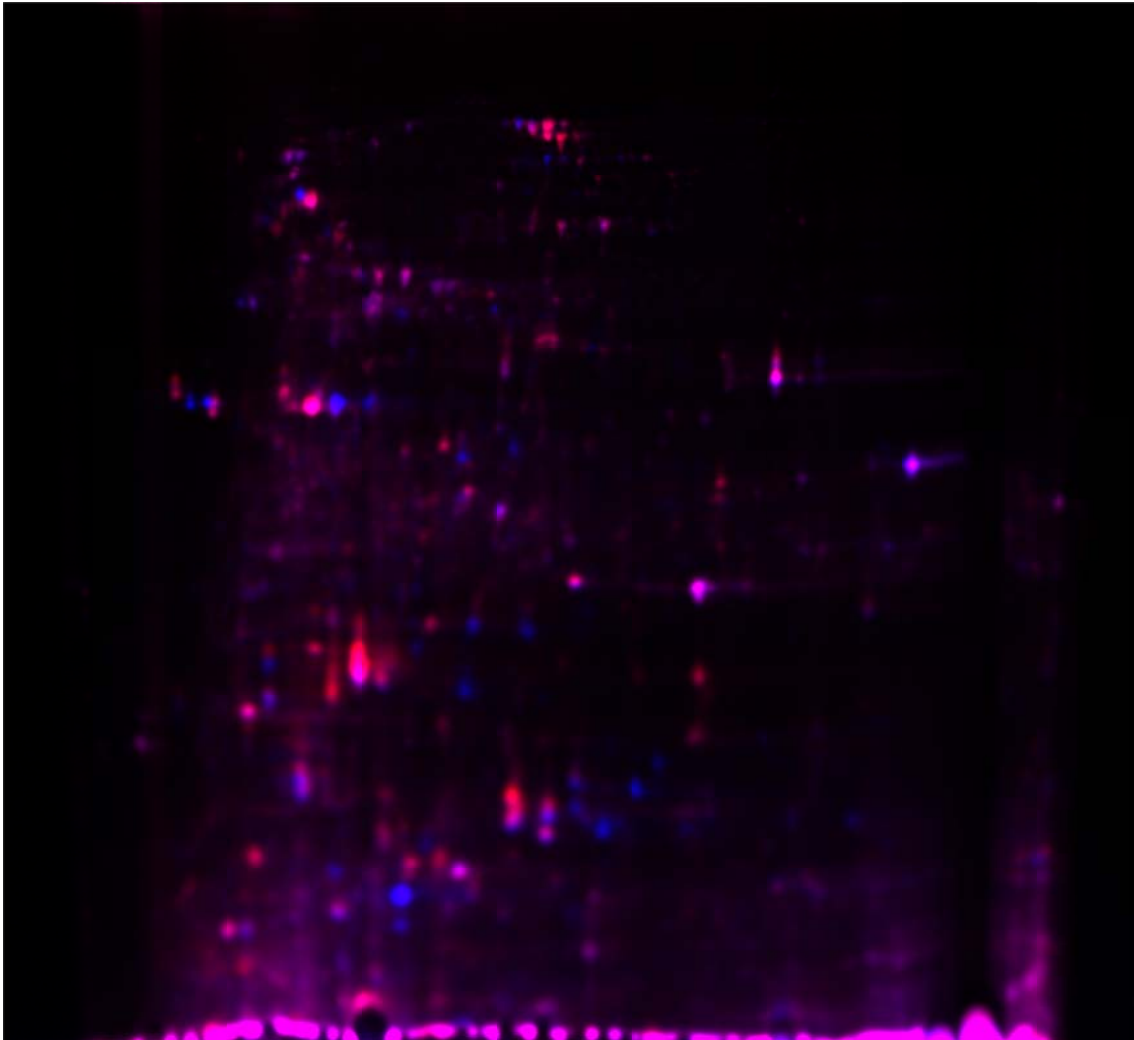



Gel 4 07 Ctrl N2(Cy3) vs 07 Cd N2(Cy5)

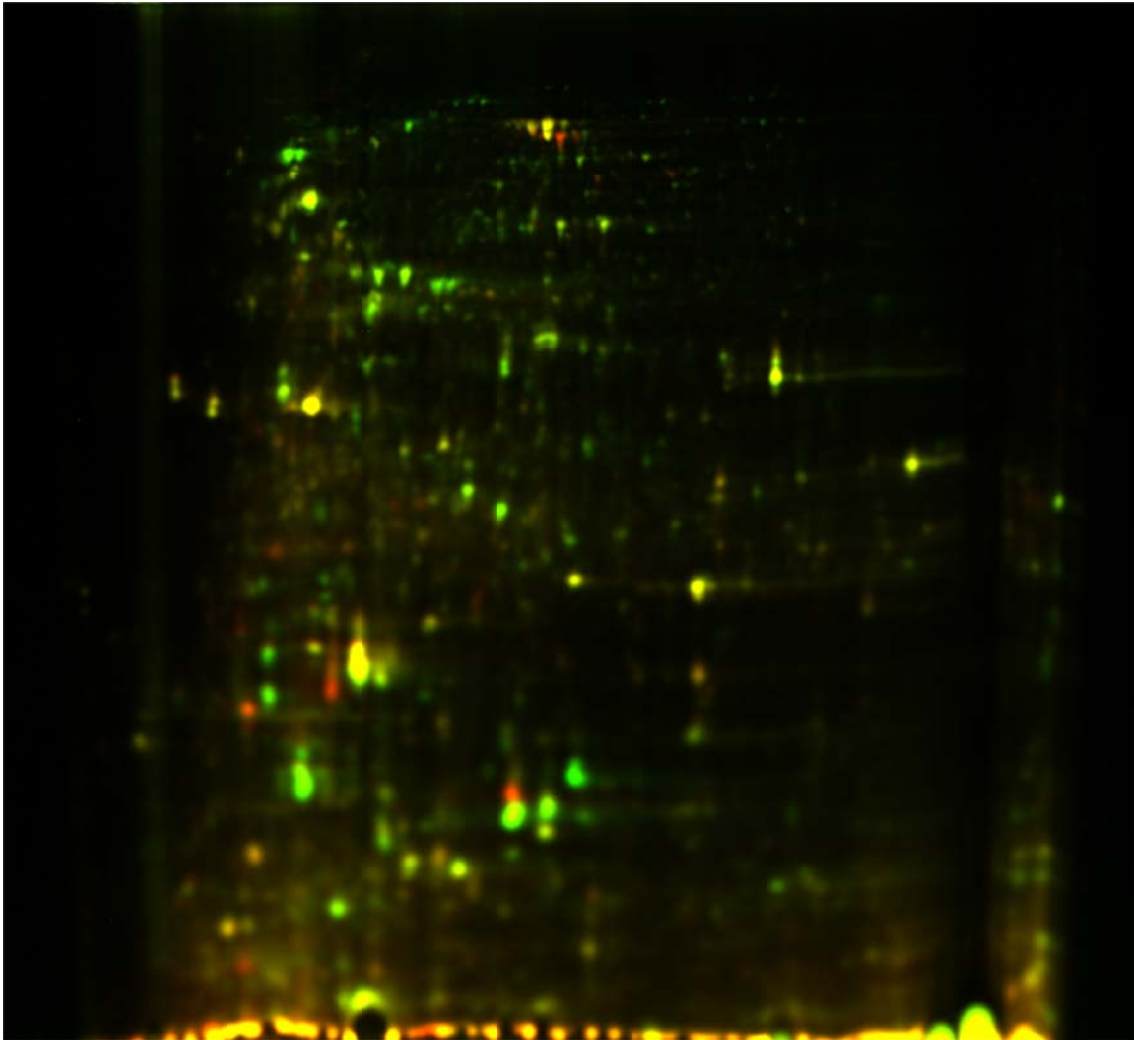

Gel 5 Cy2 vs ATCC Ctrl N3(Cy3) vs 07 Ctrl N1(Cy5)

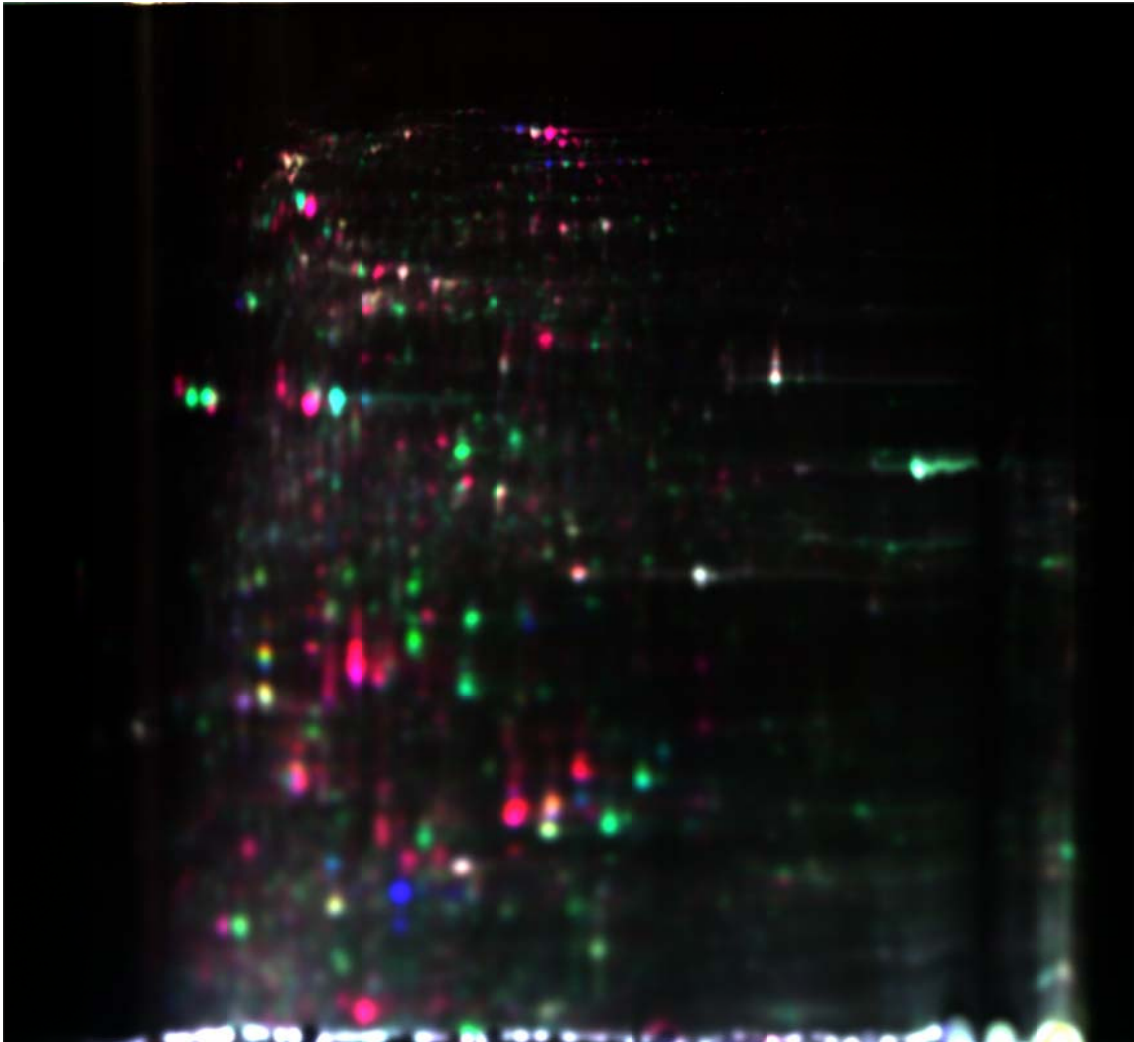

Gel 5 Cy2 vs ATCC Ctrl N3(Cy3)

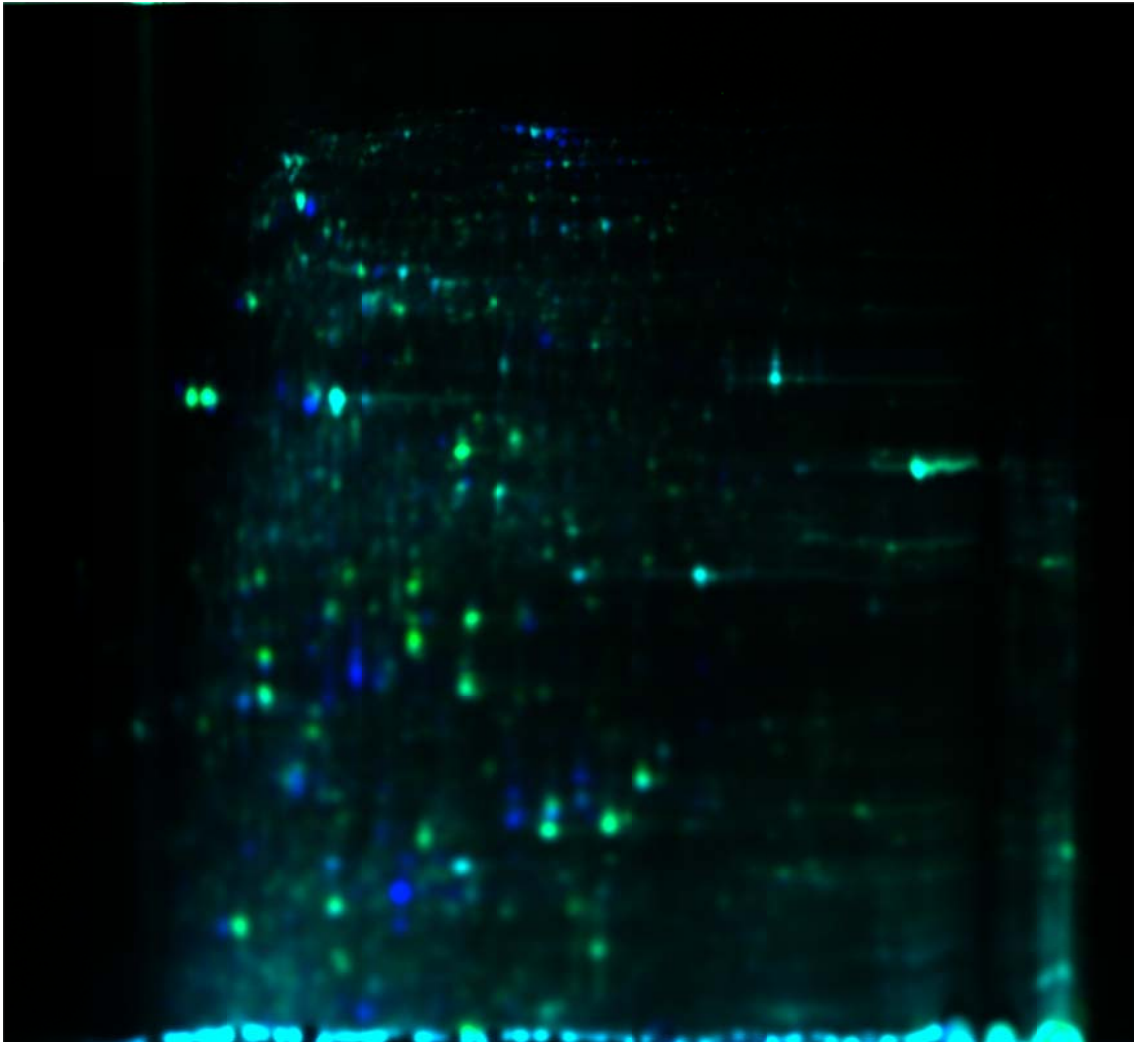

Gel 5 Cy2 vs 07 Ctrl N1(Cy5)

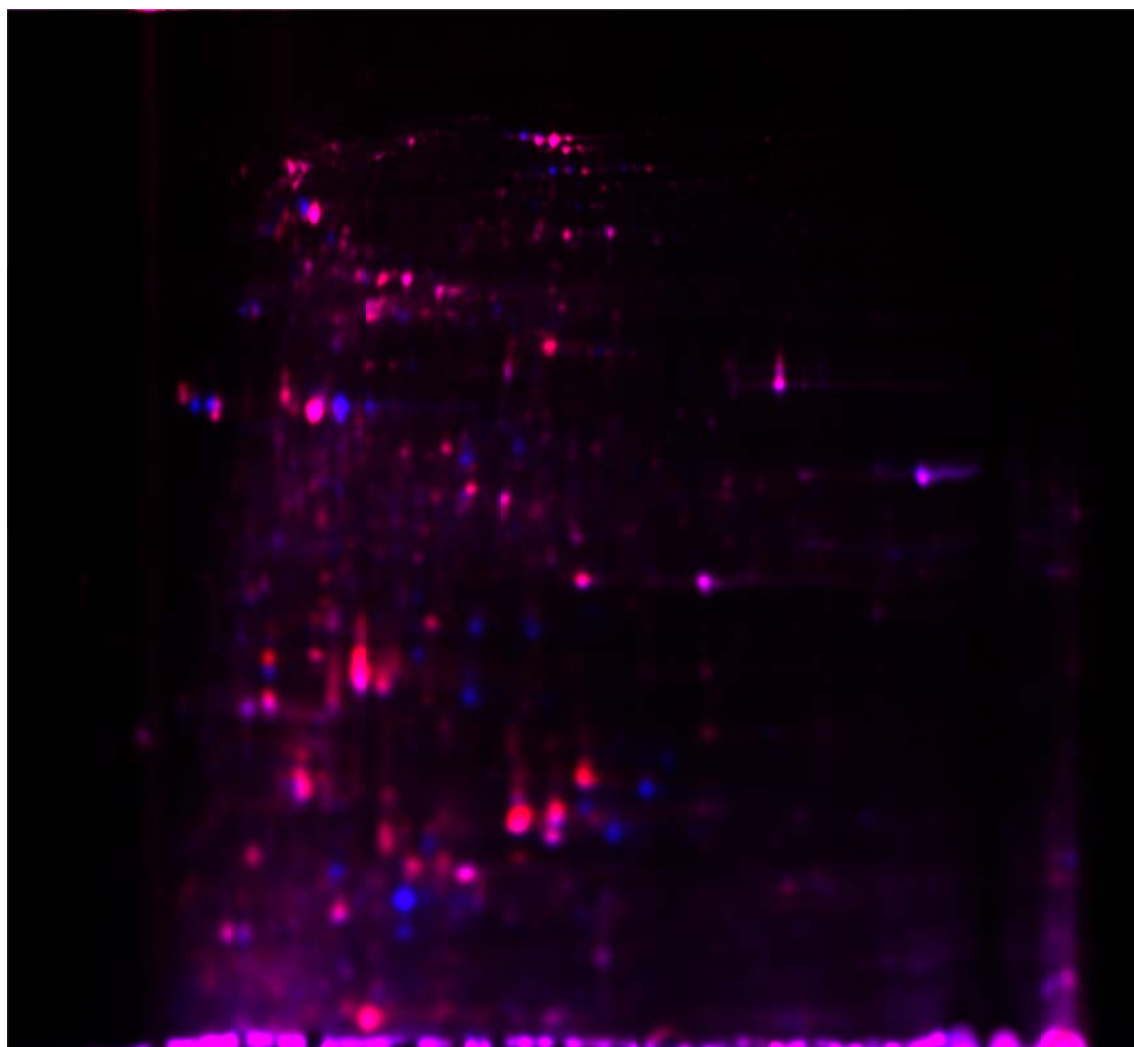

Gel 5 ATCC Ctrl N3(Cy3) vs 07 Ctrl N1(Cy5)

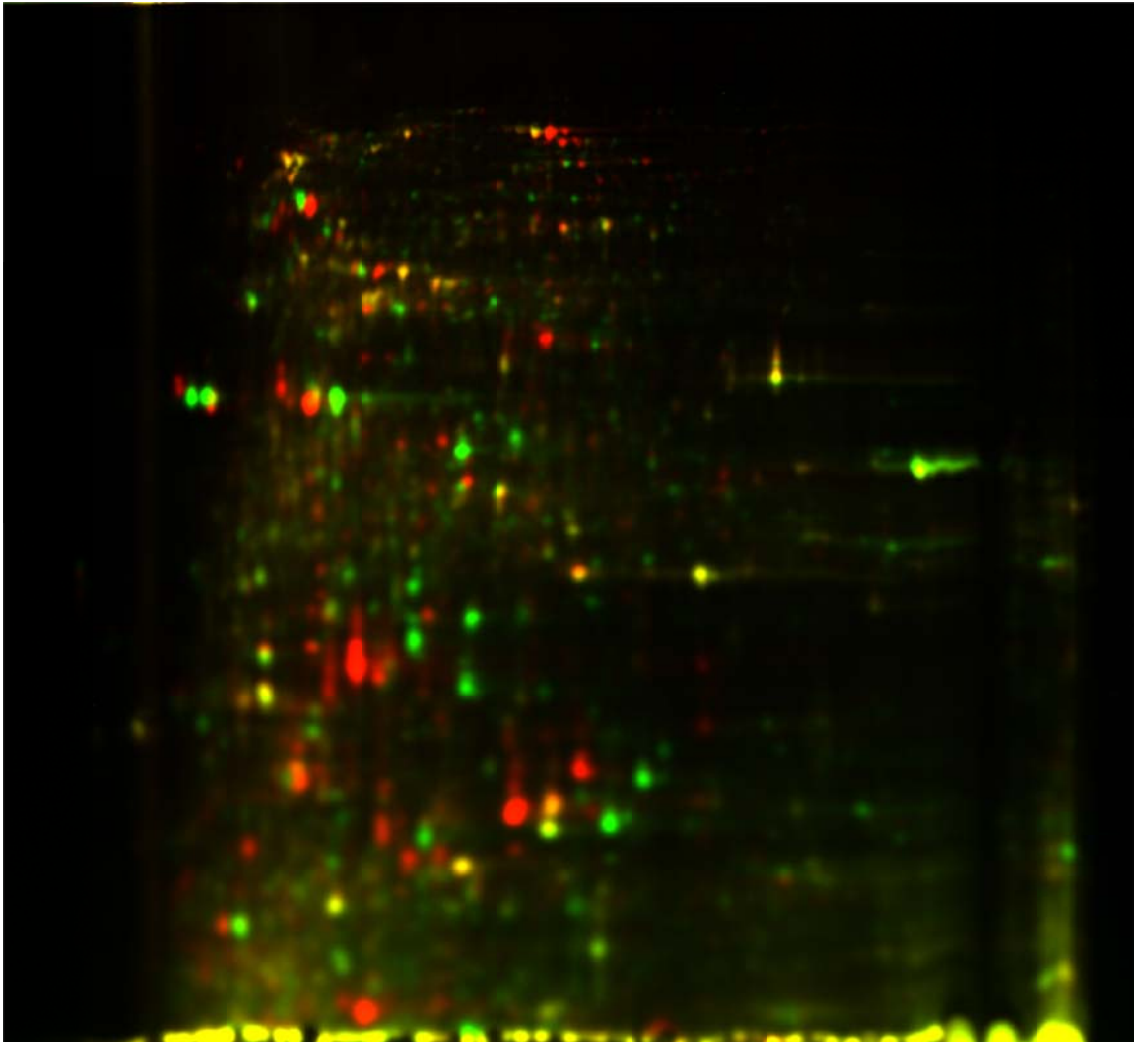

Gel 6 Cy2 vs 07 Cd N3(Cy3) vs 01 Ctrl N3(Cy5)

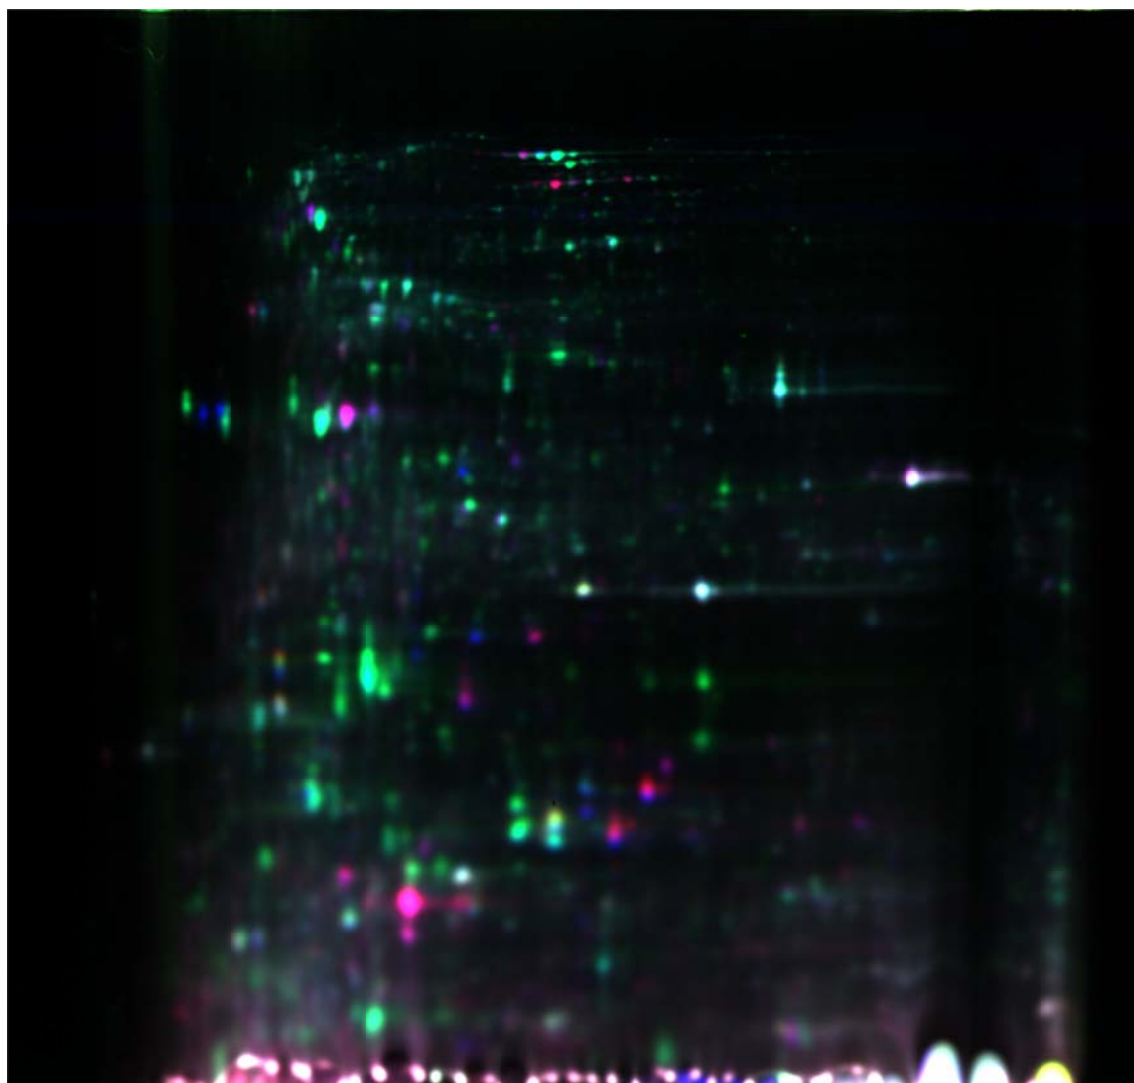

Gel 6 Cy2 vs 07 Cd N3(Cy3)

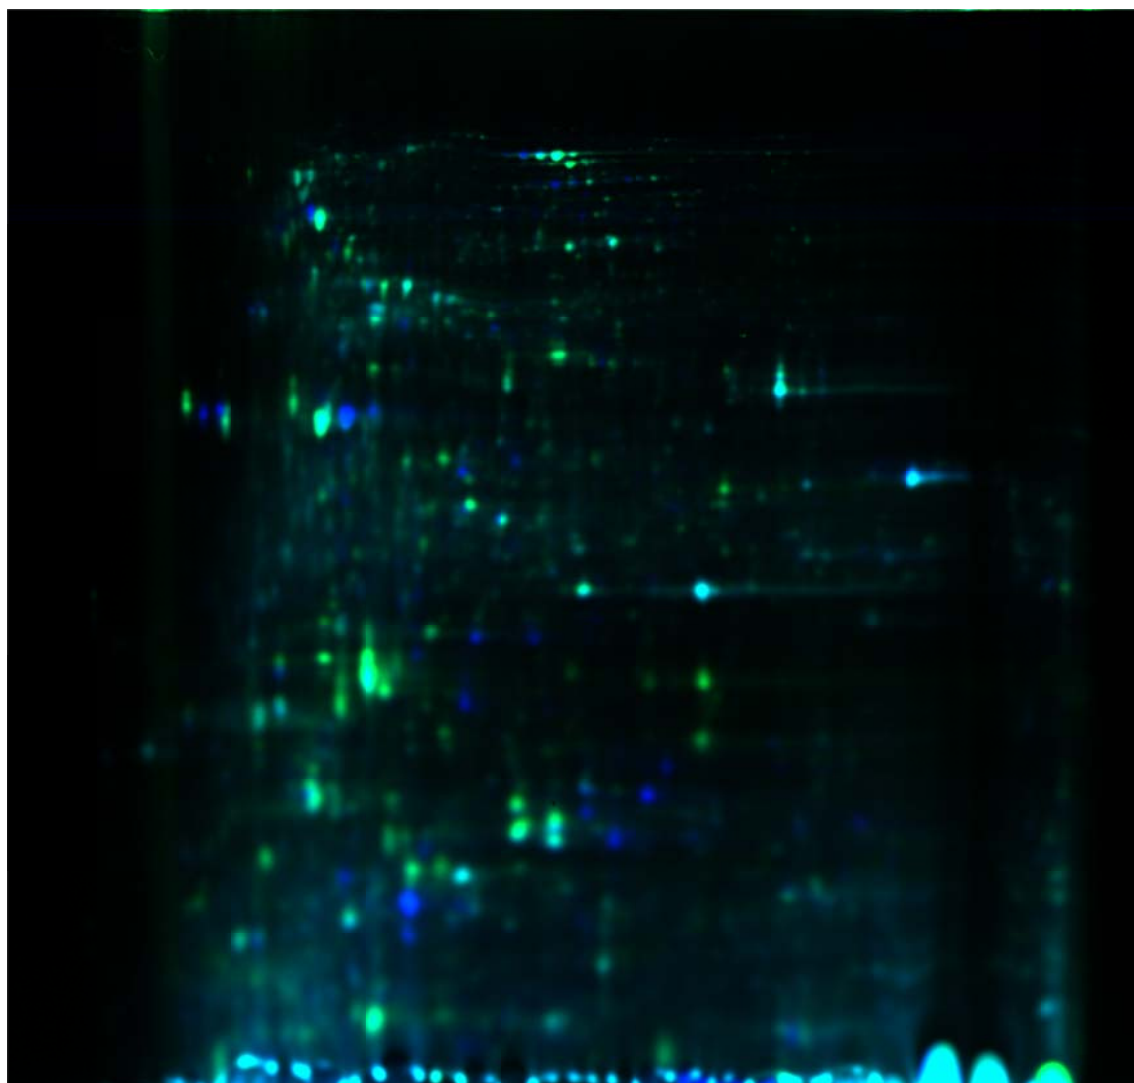

Gel 6 Cy2 vs 01 Ctrl N3(Cy5)

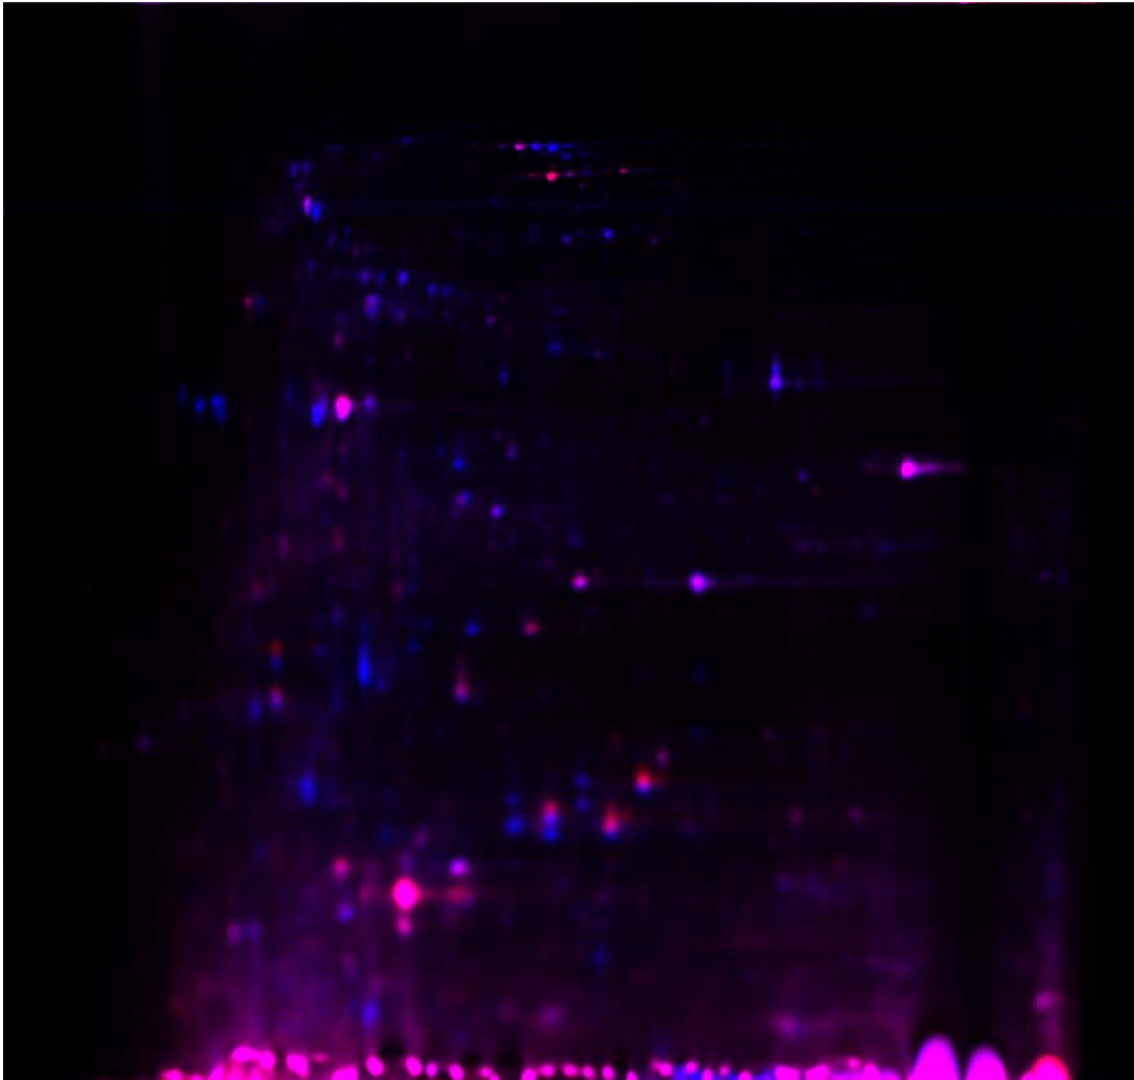



Gel 6 07 Cd N3(Cy3) vs 01 Ctrl N3(Cy5)

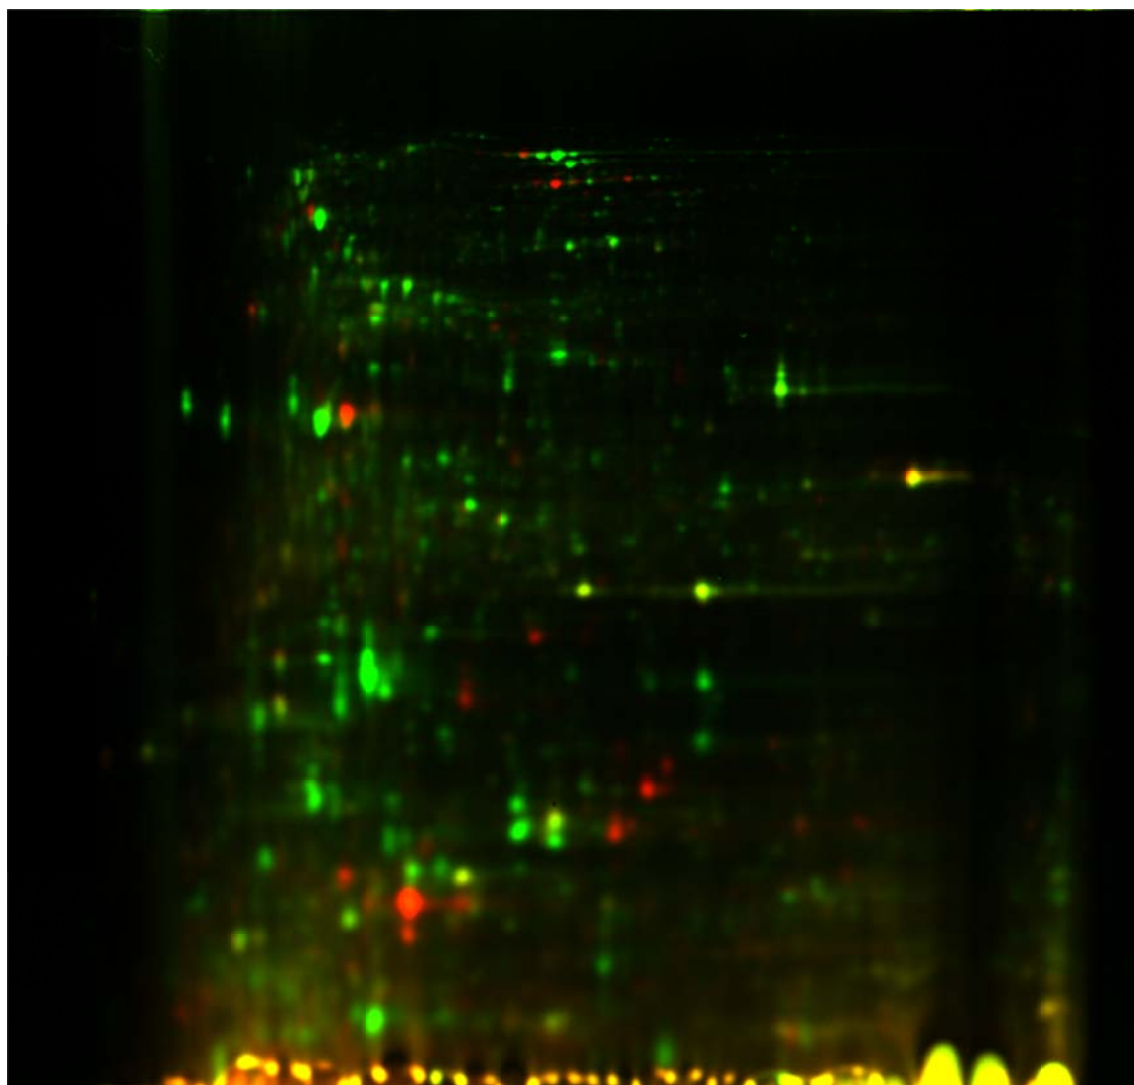

Gel 7 Cy2 vs ATCC Ctrl N2(Cy3) vs ATCC Cd N2(Cy5)

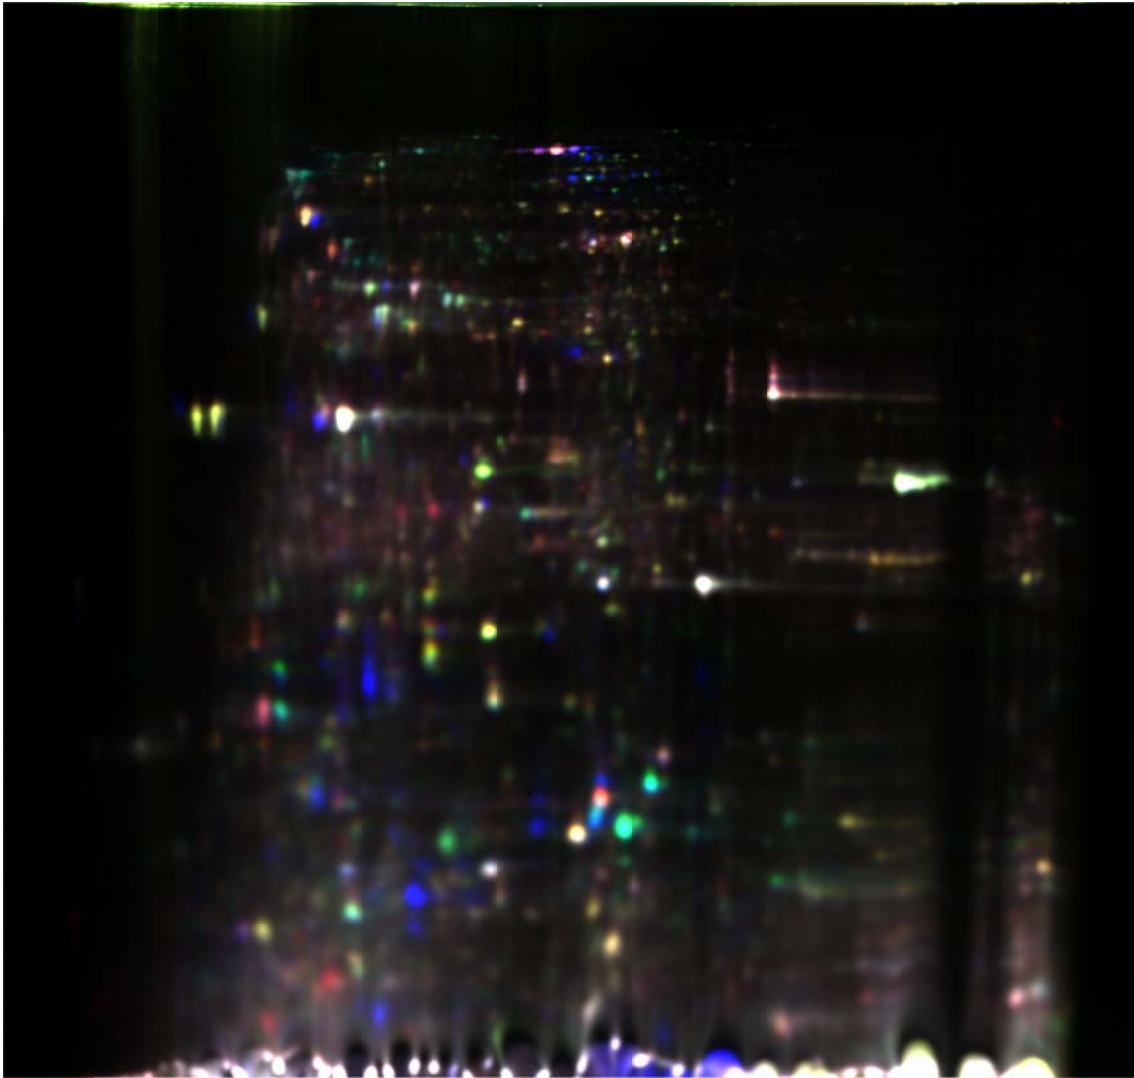

Gel 7 Cy2 vs ATCC Ctrl N2(Cy3)

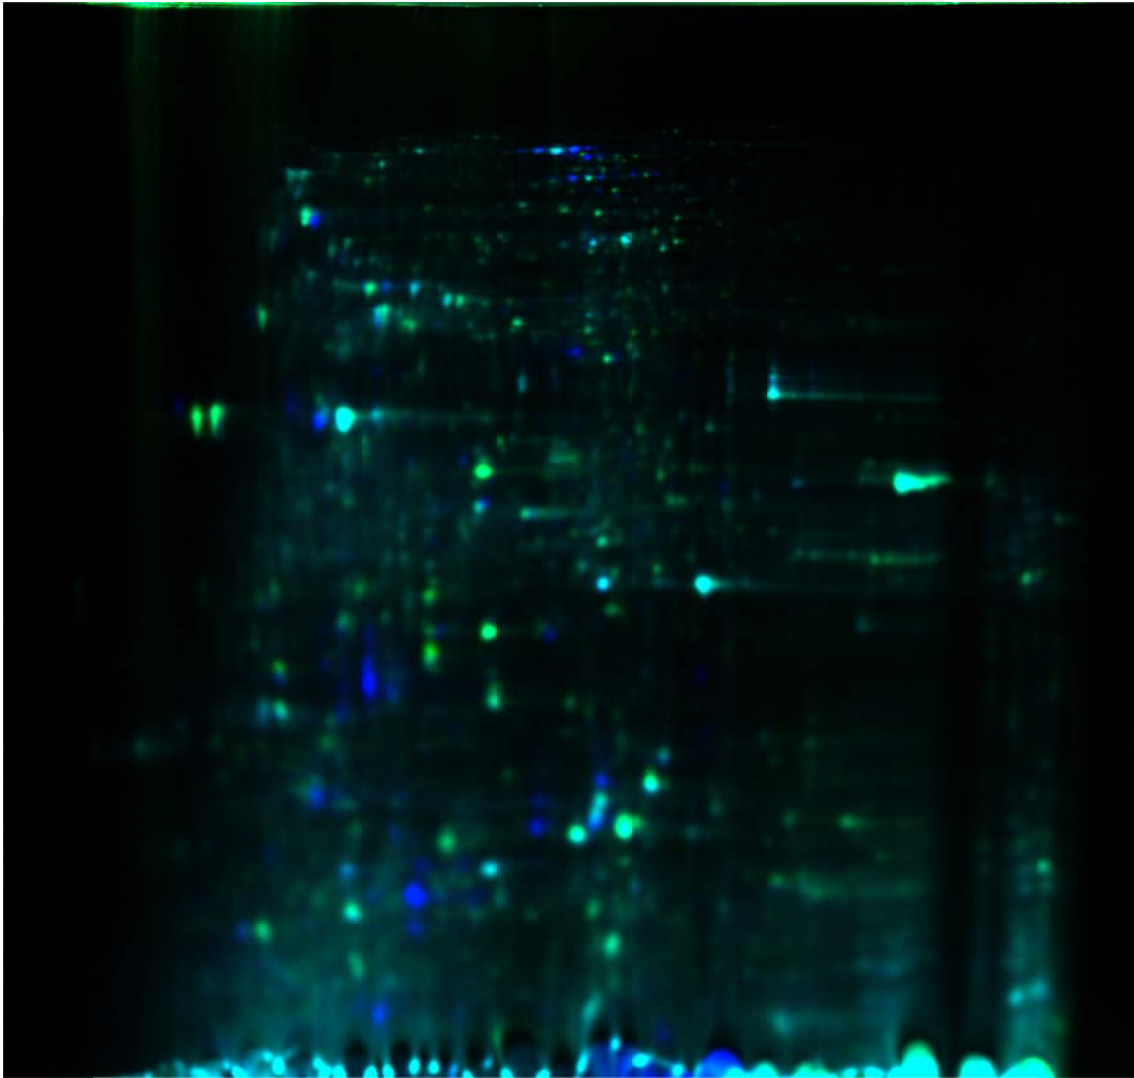

Gel 7 Cy2 vs ATCC Cd N2(Cy5)

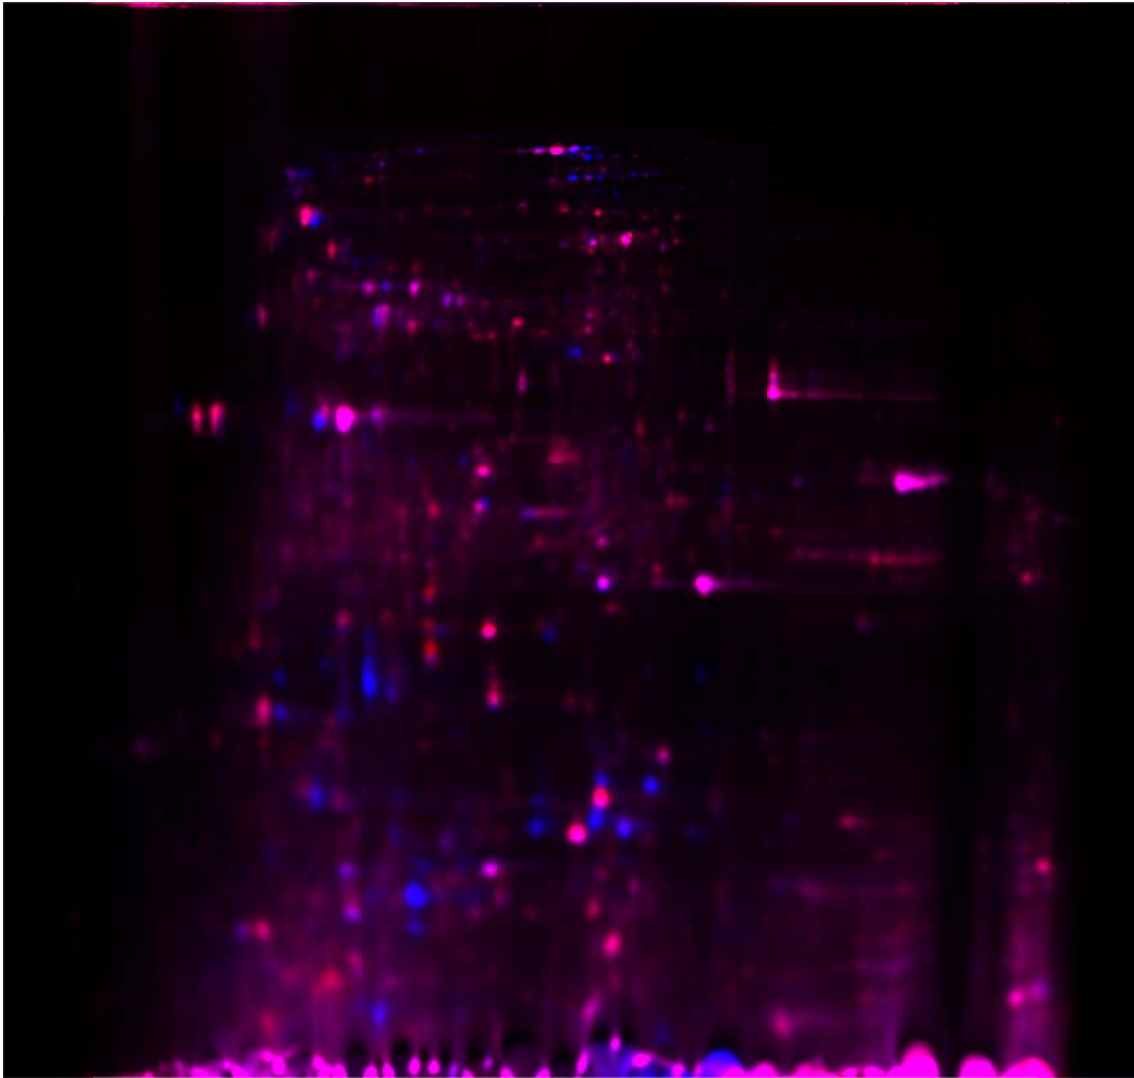

Gel 7 ATCC Ctrl N2(Cy3) vs ATCC Cd N2(Cy5)

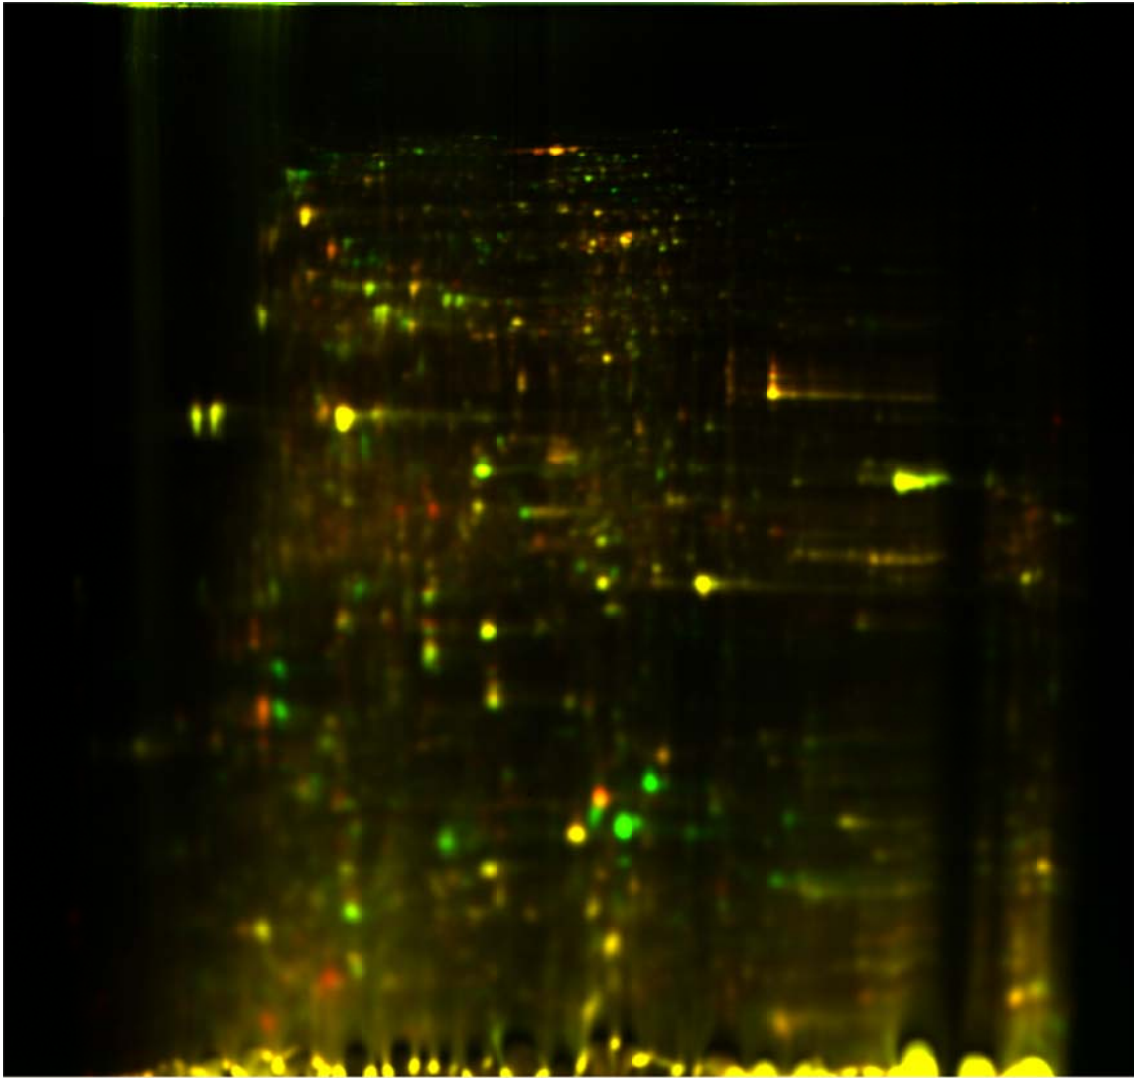

Gel 8 Cy2 vs ATCC Cd N1(Cy3) vs 01 Cd N1(Cy5)

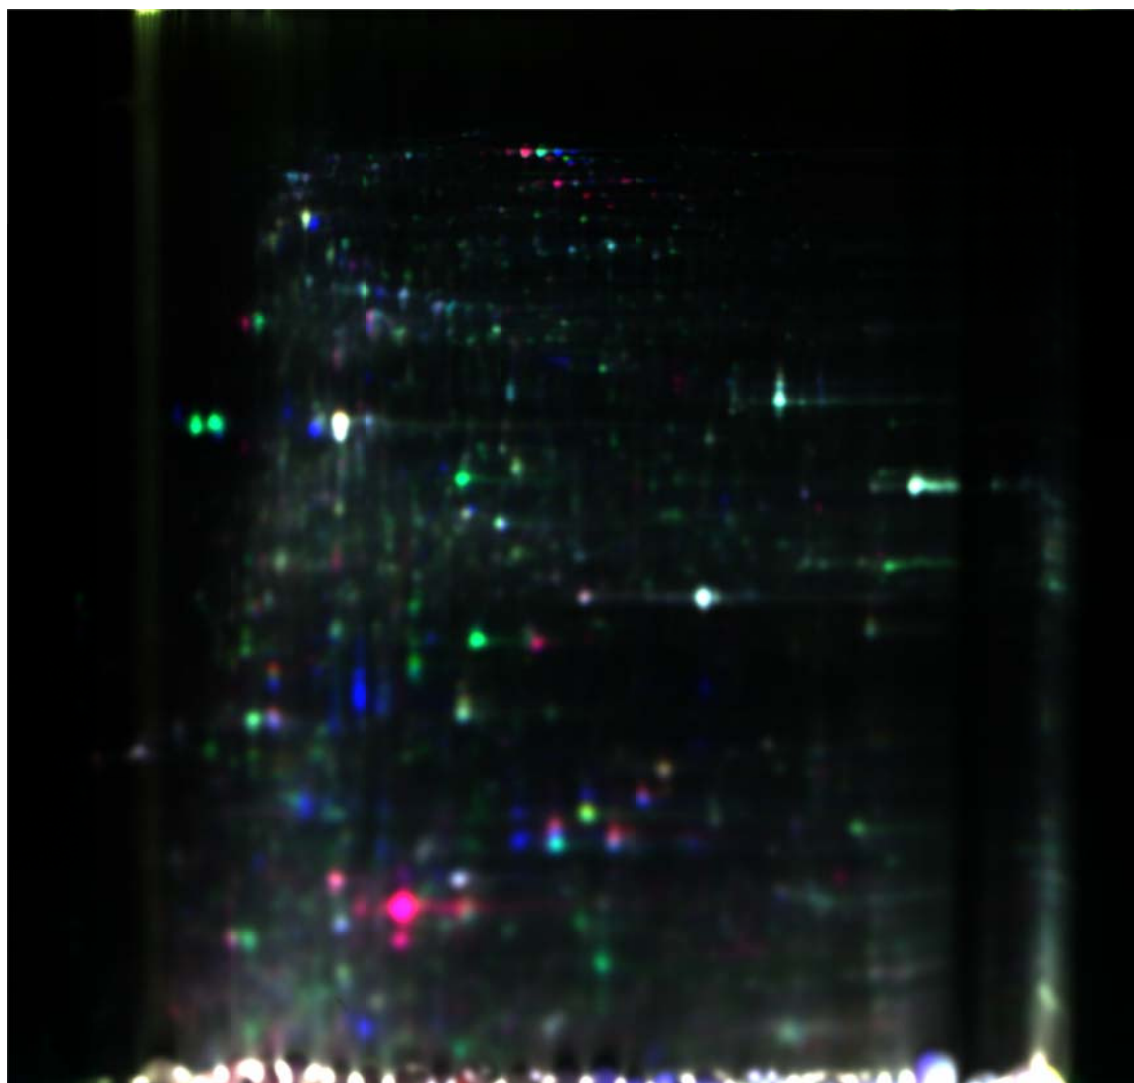

Gel 8 Cy2 vs ATCC Cd N1(Cy3)

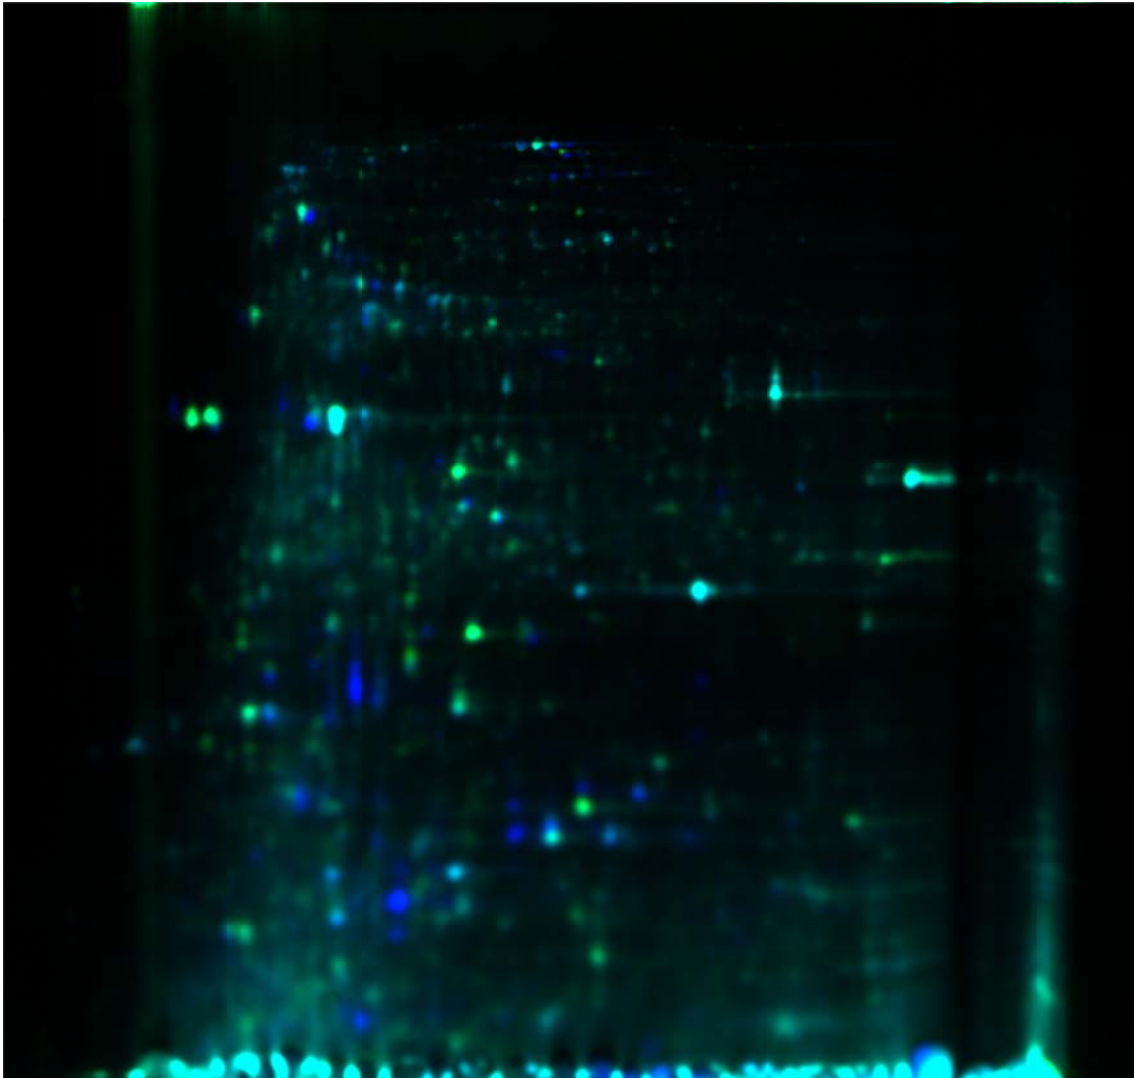



Gel 8 Cy2 vs 01 Cd N1(Cy5)

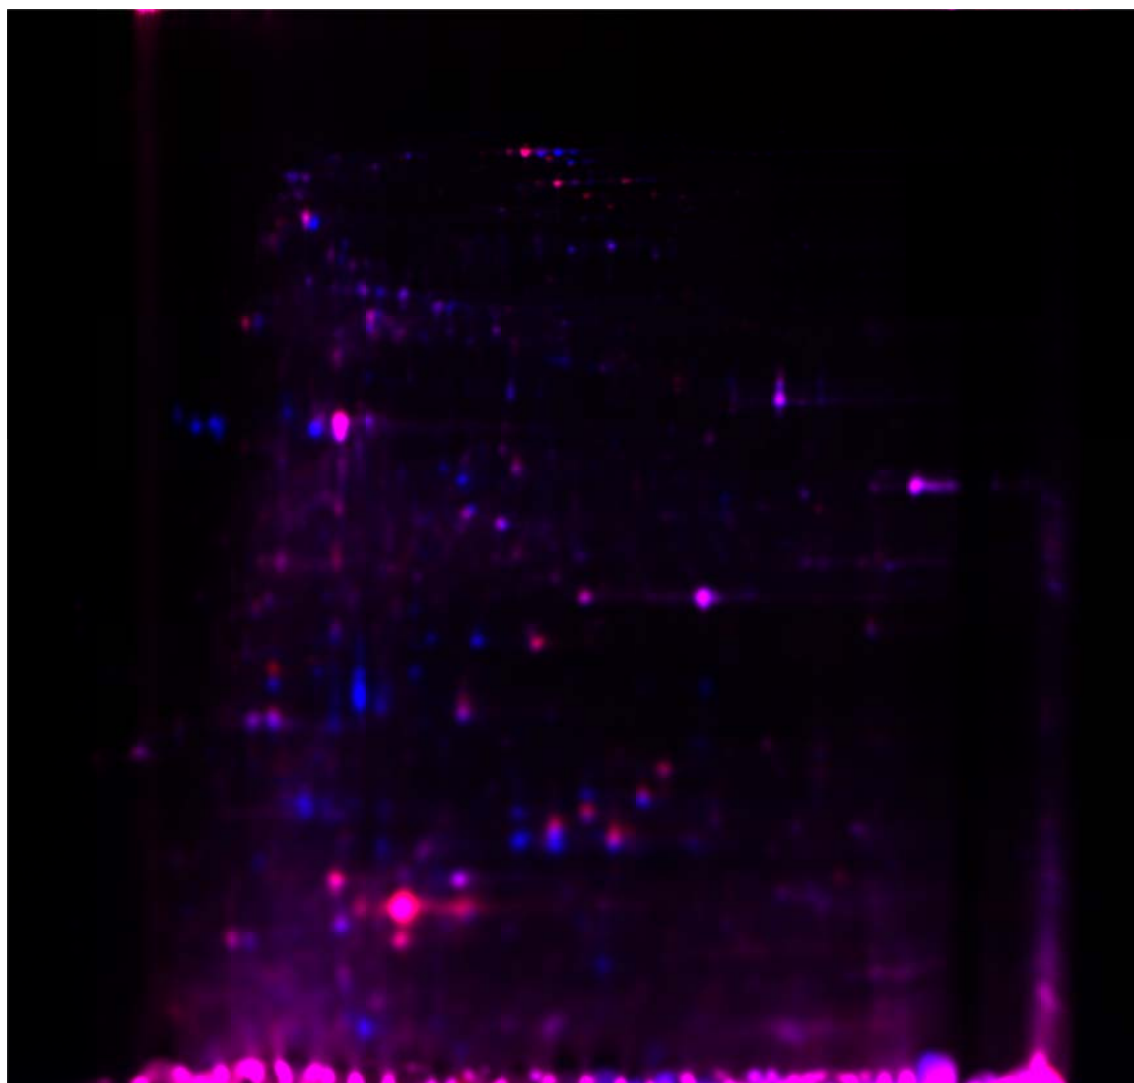



Gel 8 ATCC Cd N1(Cy3) vs 01 Cd N1(Cy5)

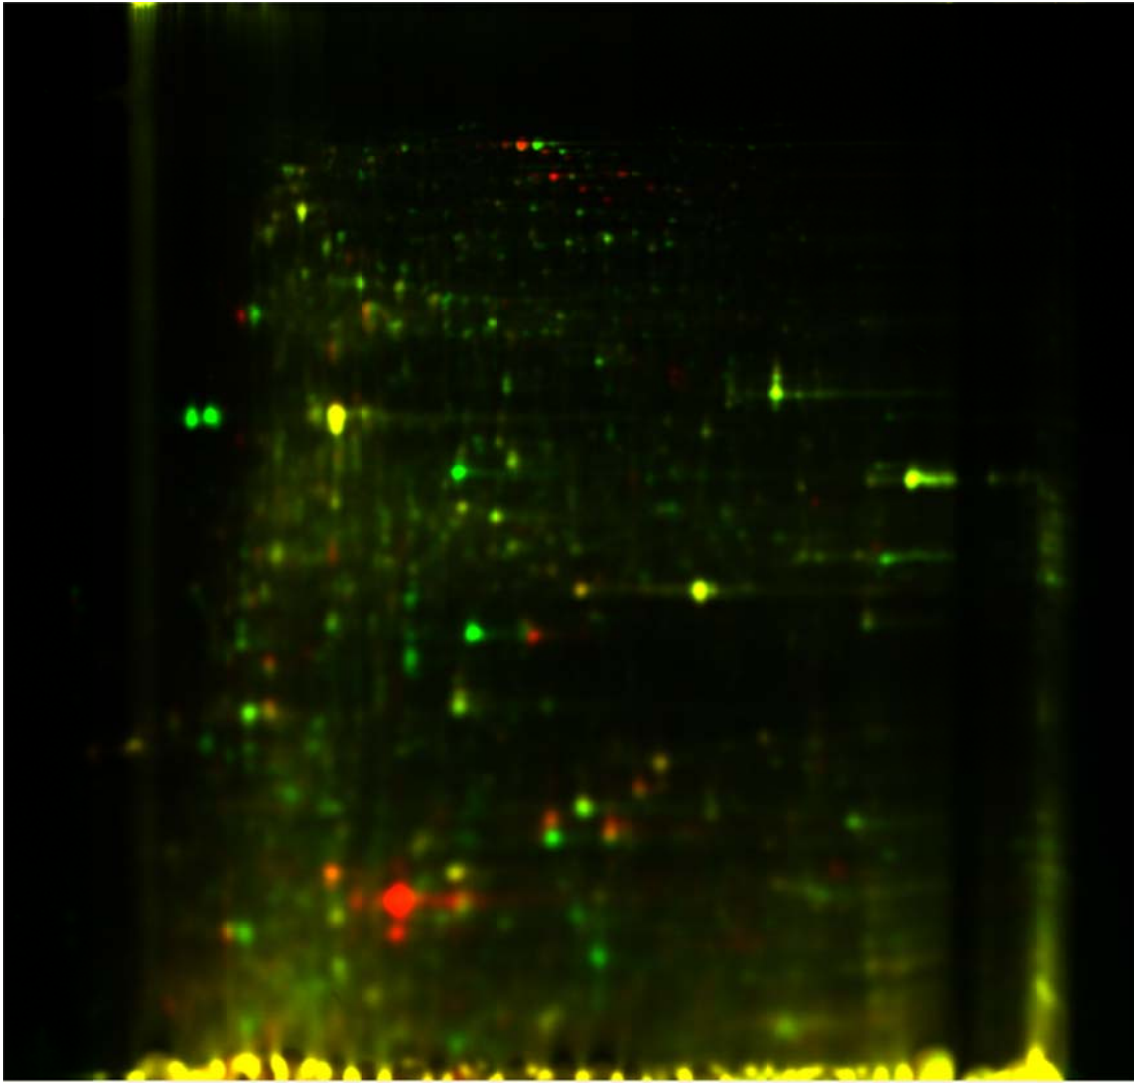

Gel 9 Cy2 vs 01 Cd N3(Cy3) vs ATCC Cd N3(Cy5)

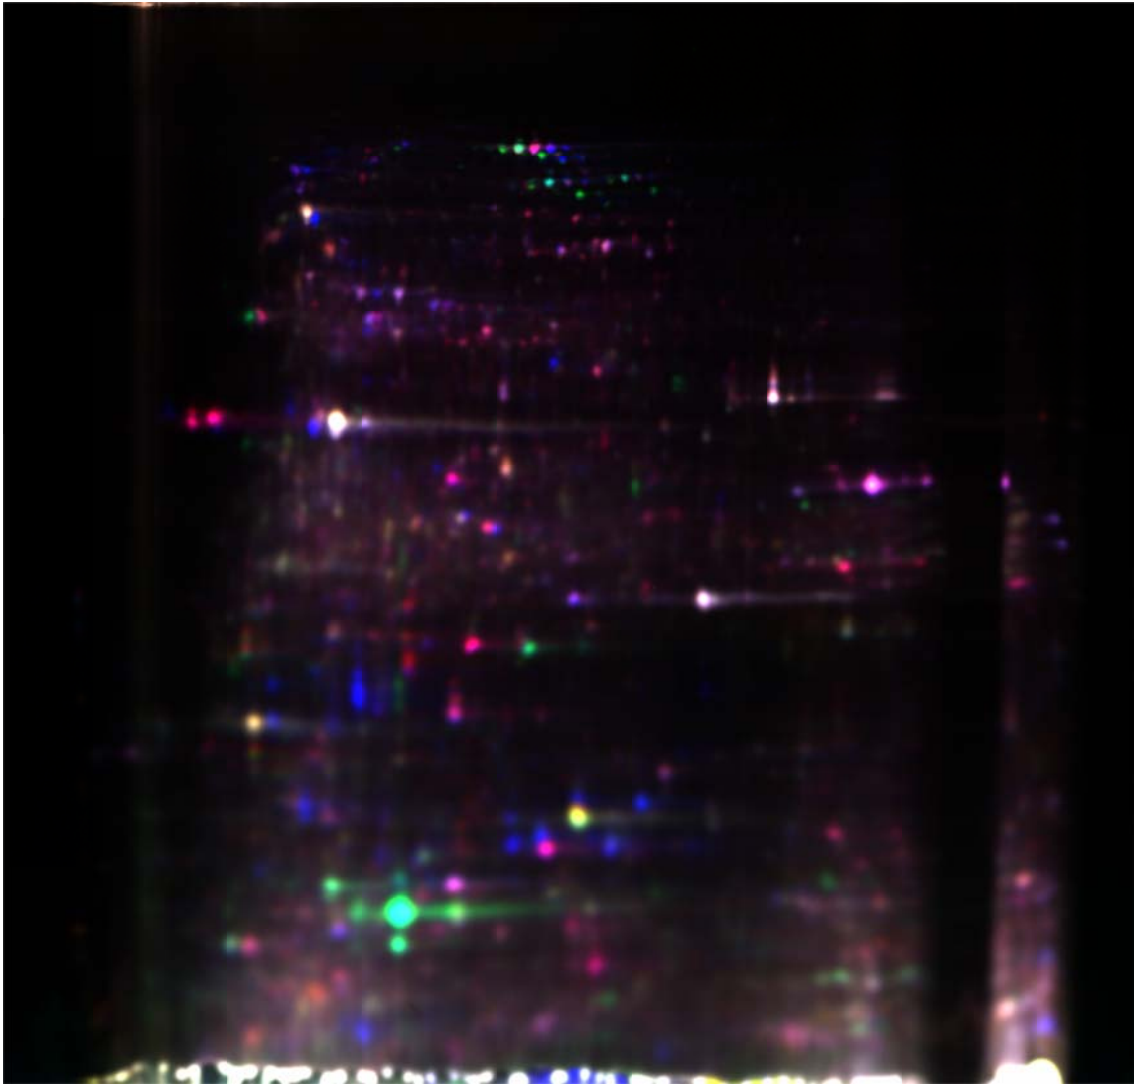

Gel 9 Cy2 vs 01 Cd N3(Cy3)

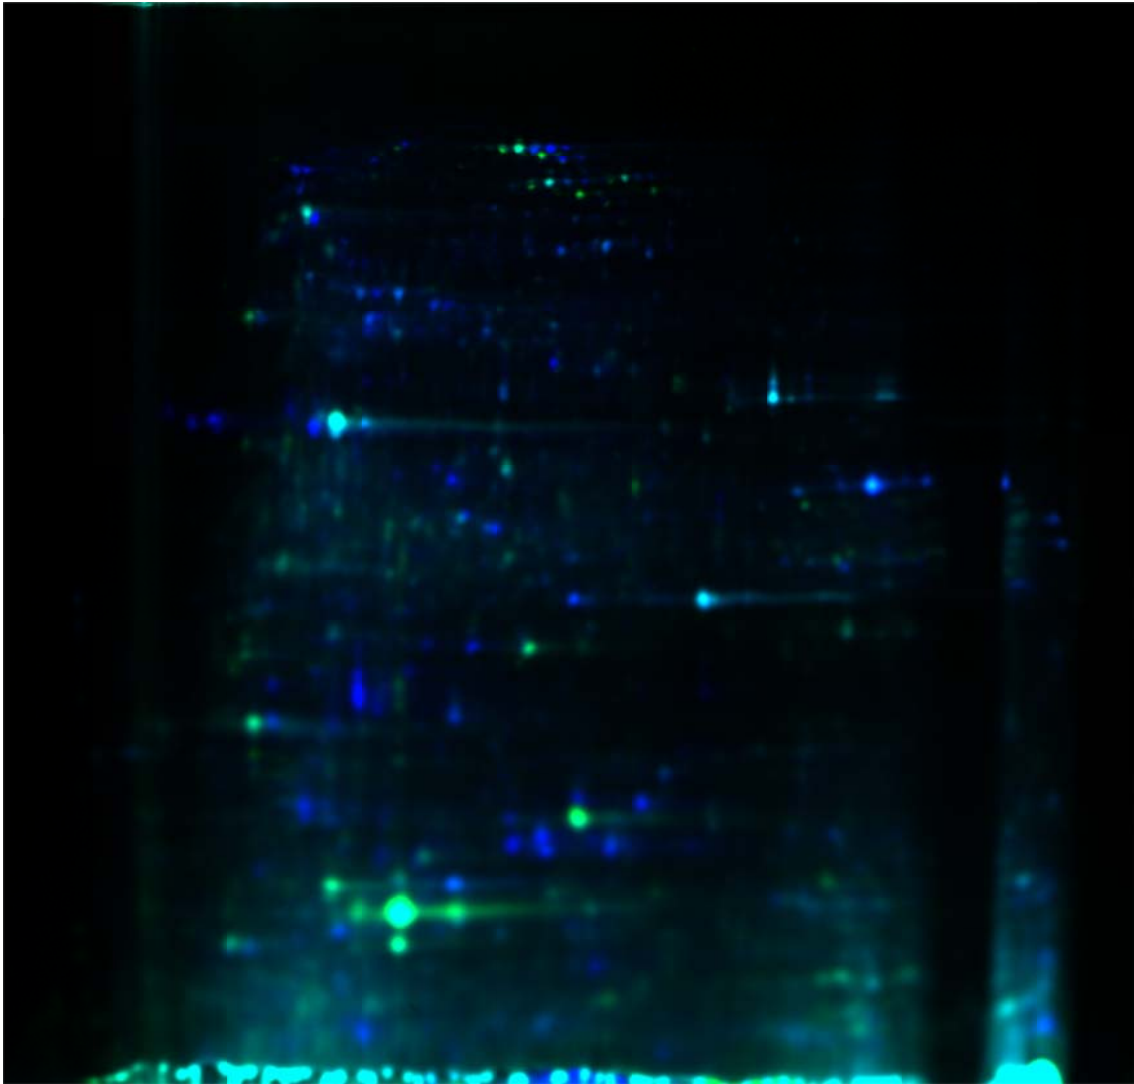

Gel 9 Cy2 vs ATCC Cd N3(Cy5)

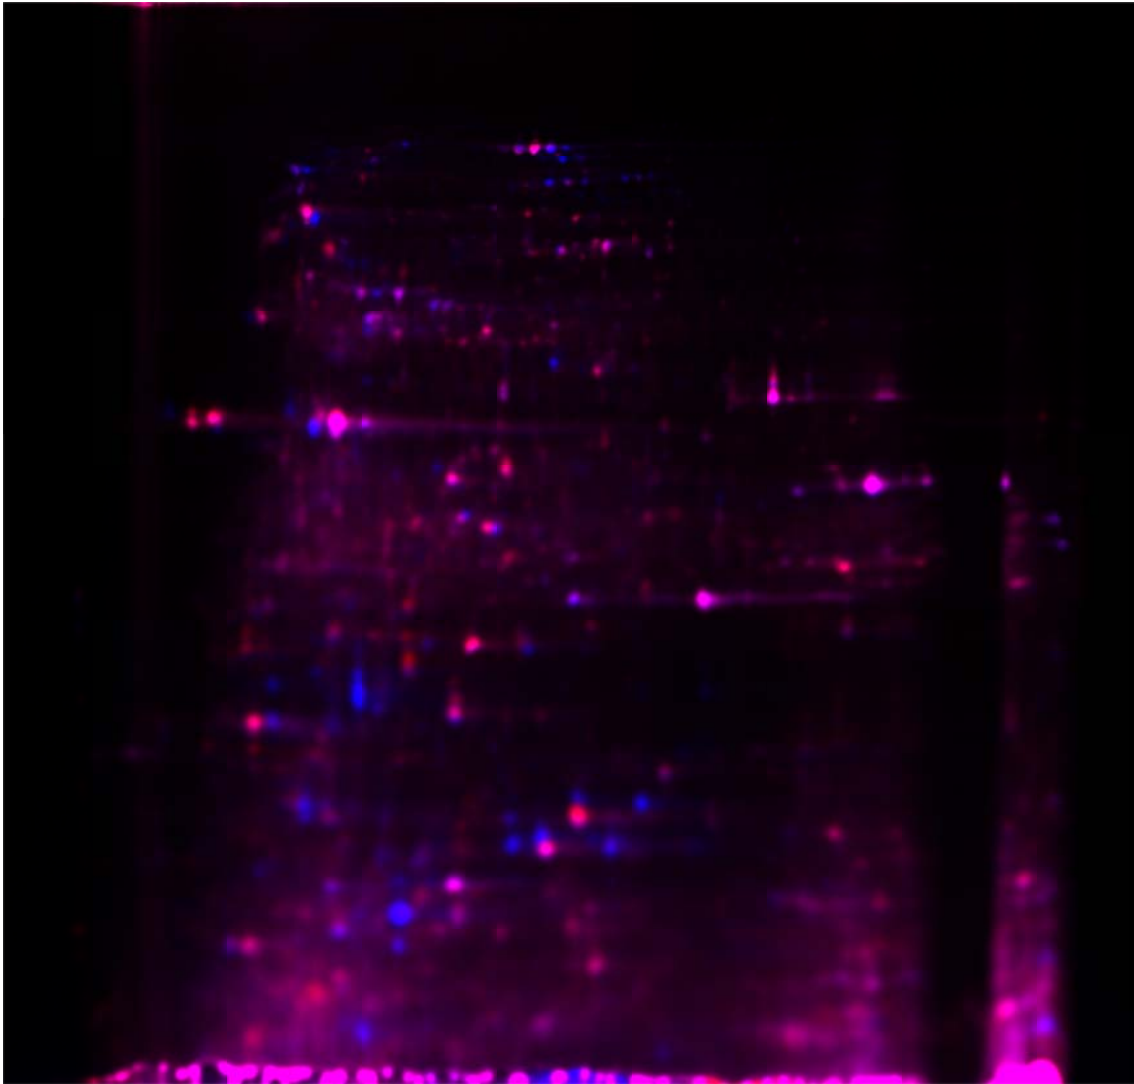

Gel 9 01 Cd N3(Cy3) vs ATCC Cd N3(Cy5)

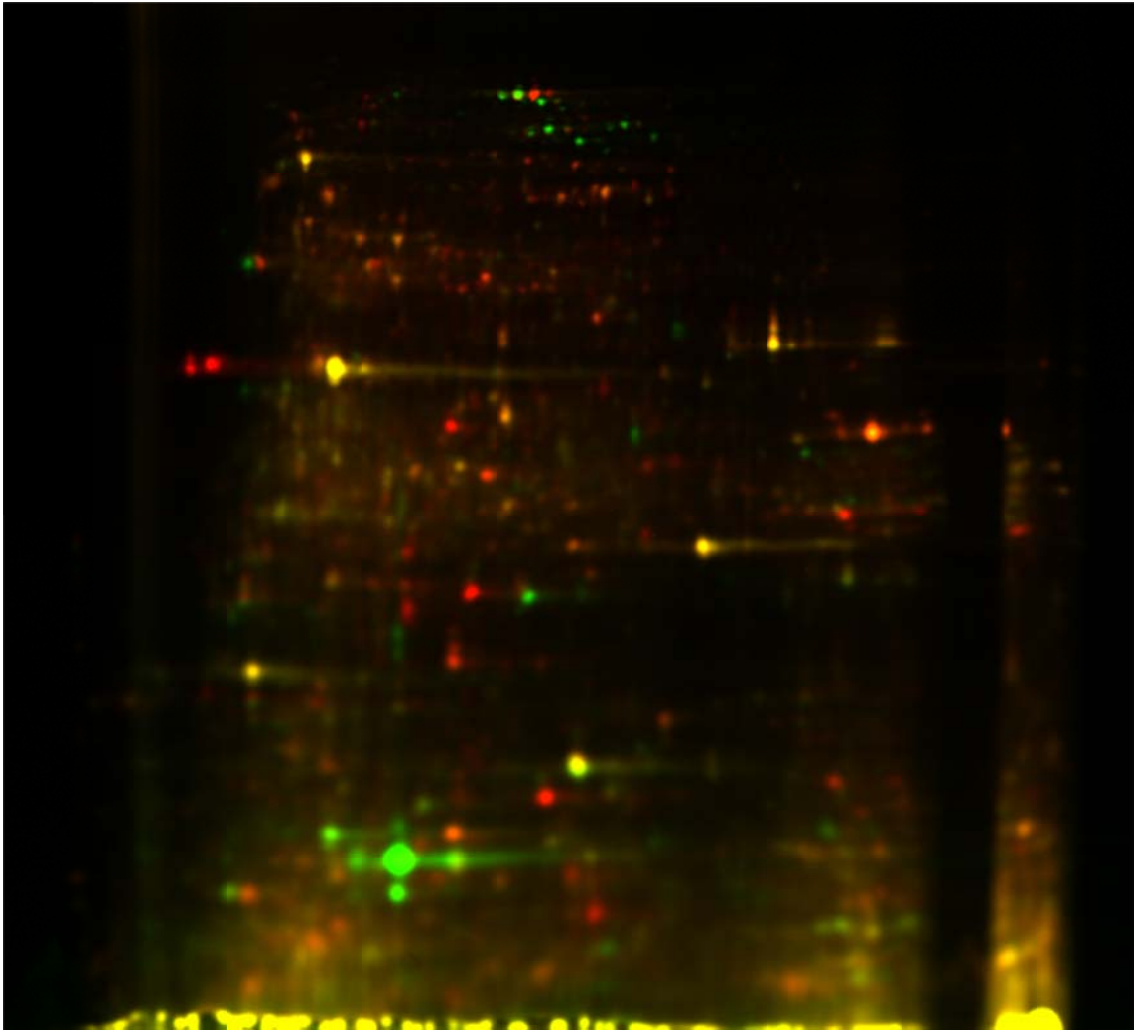

Supplement: Raw_data_of_DIGE_results.pdf [file Raw_data_of_DIGE_results.pdf]
