# Supplementary material for: Proteomics and bioinformatics analysis reveal potential roles of cadmium-binding proteins in cadmium tolerance and accumulation of Enterobacter cloacae
Source: PeerJ. 2019 Sep 2;7:e6904. doi: 10.7717/peerj.6904 (PMC6727835; doi:10.7717/peerj.6904)
Supplement: Supplemental Information 1 [file peerj-07-6904-s001.xlsx]

## Sheet: Sheet1
Time (h)	ATCC	SD_ATCC	ATCC+Cd	SD_ATCC+Cd	EC01	SD_EC01	EC01+Cd	SD_EC01+Cd	EC07	SD_EC07	EC07+Cd	SD_EC07+Cd
0	0.005	0.0026458	0.0013333	0.00057735	0.0066667	0.0030551	0.0036667	0.0037859	0.0046667	0.0011547	0.0036667	0.0015275
1	0.0137	0.0040415	0.0056667	0.0040415	0.0157	0.0040415	0.011	0.0051962	0.0207	0.0025166	0.0053333	0.0011547
2	0.1067	0.0199	0.043	0.015	0.1243	0.0090185	0.085	0.0065574	0.1923	0.0095044	0.033	0.0043589
3	0.2787	0.0265	0.1563	0.026	0.3337	0.0102	0.249	0.0125	0.3893	0.0020817	0.1821	0.0218
4	0.357	0.0445	0.2893	0.0126	0.402	0.0098489	0.3273	0.0121	0.515	0.0104	0.345	0.0317
5	0.4533	0.0596	0.3667	0.0174	0.4443	0.0199	0.3553	0.0068069	0.634	0.0229	0.4663	0.0461
6	0.4983	0.0597	0.433	0.0132	0.5283	0.016	0.4057	0.0089629	0.7703	0.027	0.527	0.0515
7	0.5627	0.0742	0.4783	0.0306	0.584	0.0187	0.4583	0.015	0.8867	0.0235	0.608	0.0714
8	0.6413	0.1057	0.5213	0.0513	0.6363	0.0127	0.5343	0.021	0.9723	0.0211	0.6633	0.0749
9	0.7847	0.0891	0.6913	0.0211	0.6923	0.0139	0.6177	0.0107	1.0283	0.035	0.7027	0.0861
10	0.9723	0.0199	0.7847	0.0202	0.752	0.03	0.7127	0.0081445	1.0767	0.0353	0.7397	0.083
11	1.0607	0.0323	0.8193	0.0186	0.8	0.0541	0.7947	0.0090738	1.1187	0.0361	0.7703	0.0853
12	1.1037	0.0498	0.8587	0.0112	0.854	0.0741	0.8587	0.0133	1.1643	0.0376	0.7917	0.0854
13	1.1333	0.0494	0.8897	0.0143	0.891	0.0771	0.9297	0.015	1.1917	0.0337	0.8197	0.0852
14	1.1393	0.0561	0.918	0.0225	0.925	0.0807	0.985	0.0157	1.208	0.0252	0.8407	0.084
15	1.153	0.0548	0.9337	0.0233	0.9527	0.0862	1.0223	0.0051316	1.215	0.0217	0.857	0.0867
16	1.1597	0.0559	0.9493	0.028	0.9887	0.0927	1.0663	0.0127	1.226	0.0225	0.8717	0.0899
17	1.161	0.0537	0.954	0.021	1.007	0.0882	1.0953	0.0323	1.226	0.018	0.881	0.0918
18	1.171	0.0483	0.961	0.013	1.0377	0.0907	1.1267	0.0369	1.2327	0.0202	0.8903	0.0939
19	1.1757	0.0475	0.958	0.0157	1.0553	0.0884	1.1437	0.0396	1.2363	0.0165	0.9023	0.0904
20	1.1763	0.0515	0.9597	0.0162	1.0783	0.0854	1.1573	0.0381	1.242	0.0145	0.909	0.0901
21	1.179	0.0507	0.9597	0.0146	1.1053	0.0801	1.1663	0.0328	1.254	0.0113	0.9227	0.0924
22	1.1877	0.0542	0.9667	0.0163	1.1313	0.086	1.1797	0.0307	1.2673	0.0090738	0.9357	0.0941
23	1.1963	0.0553	0.967	0.0148	1.1493	0.0872	1.1917	0.0351	1.2777	0.0070238	0.95	0.0953
24	1.2037	0.0559	0.9687	0.0179	1.1637	0.0842	1.196	0.0328	1.2823	0.0077675	0.9587	0.0959
