# Supplementary material for: Proteomics and bioinformatics analysis reveal potential roles of cadmium-binding proteins in cadmium tolerance and accumulation of Enterobacter cloacae
Source: PeerJ. 2019 Sep 2;7:e6904. doi: 10.7717/peerj.6904 (PMC6727835; doi:10.7717/peerj.6904)
Supplement: Supplemental Information 2 [file peerj-07-6904-s002.xlsx]

## Sheet: Sheet1
Time (h)	ATCC	SD_ATCC	EC01	SD_EC01	EC07	SD_EC07
15 min	0.7703	0.0291	0.5915	0.0418	0.916	0.0485
1.5 hours	0.9475	0.05	1.0802	0.0208	1.1503	0.0274
6 hours	2.2637	0.0772	2.66	0.2817	1.866	0.1475
