# Supplementary material for: Proteomics and bioinformatics analysis reveal potential roles of cadmium-binding proteins in cadmium tolerance and accumulation of Enterobacter cloacae
Source: PeerJ. 2019 Sep 2;7:e6904. doi: 10.7717/peerj.6904 (PMC6727835; doi:10.7717/peerj.6904)
Supplement: Supplemental Information 3 [file peerj-07-6904-s003.xlsx]

## Sheet: Sheet1
	Cd adsorption	SD
EC ATCC 13047	0.2461	0.0417
EC01	0.5651	0.0794
EC07	0.2466	0.0327
